# Supplementary material
Source: PubMed Central journal article supplement (PMC4570278)
Supplement: mmc1.pdf [file mmc1.pdf]

The American Journal of Human Genetics

Supplemental Data

## **Mixed Model with Correction for Case-Control**

### **Ascertainment Increases Association Power**

Tristan J. Hayeck, Noah A. Zaitlen, Po-Ru Loh, Bjarni Vilhjalmsson, Samuela Pollack, Alexander Gusev, Jian Yang, Guo-Bo Chen, Michael E. Goddard, Peter M. Visscher, Nick Patterson, and Alkes L. Price

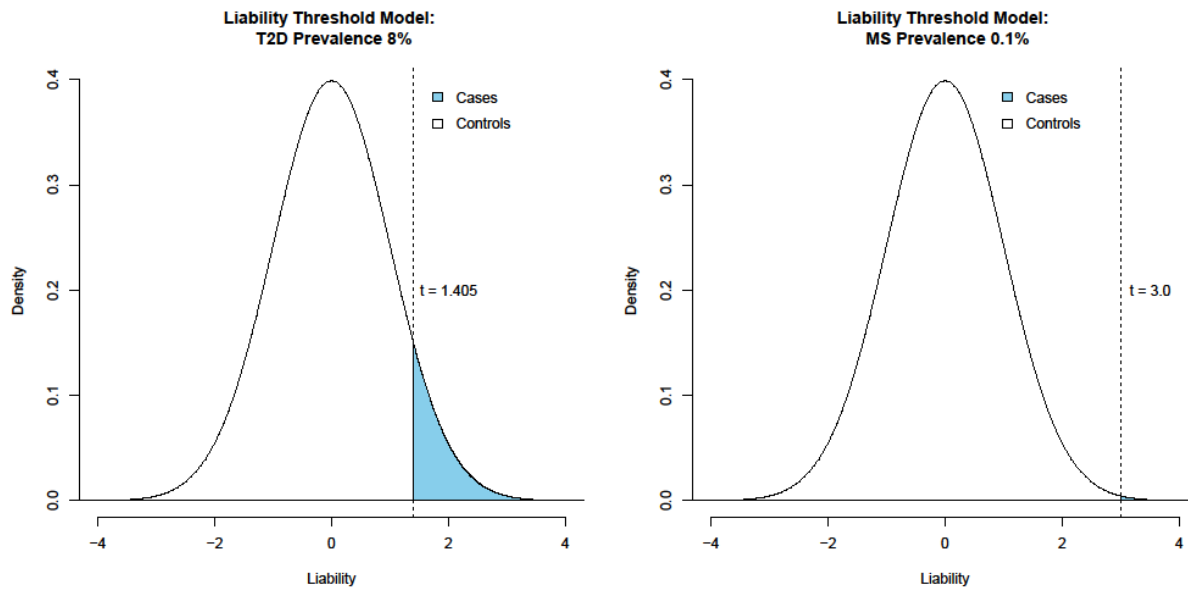

**Figure S1. Liability Threshold Model.** The liability threshold model performs a transformation based on disease prevalence. As ascertainment becomes more drastic so does the difference between the PML for cases versus controls. In Figure S1, the portion of the population above the threshold is a case (blue). For T2D, at a prevalence of 8% (blue), the threshold is set to 1.405. In this region, the expected value for the posterior liability is 1.85 and the expected value for the controls is -0.14. Comparing T2D to MS with disease prevalence around 0.1% and  $t$  around 3.00, the  $PML_{\text{indiv}}$  for a control is 0.00 and 3.33 for a case. As the disease prevalence goes down the difference in the  $PML_{\text{indiv}}$  for cases versus controls increases, the transformation plays a larger role for rare diseases and results in a power gain for the LTMLM.

**A**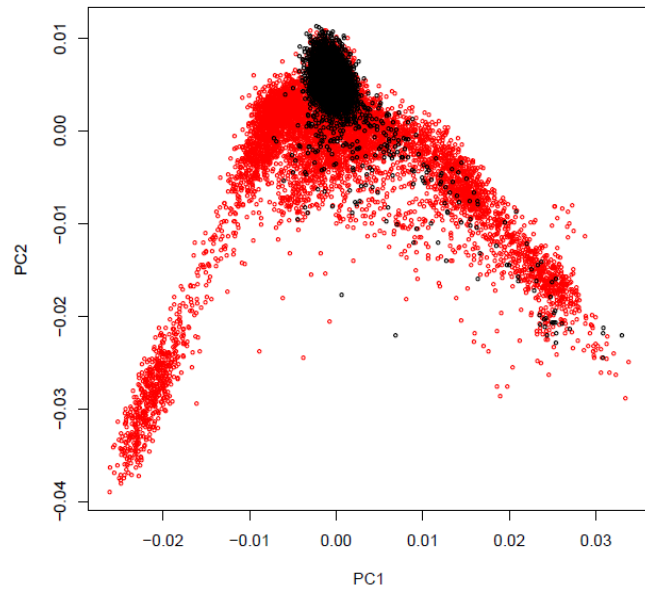**B**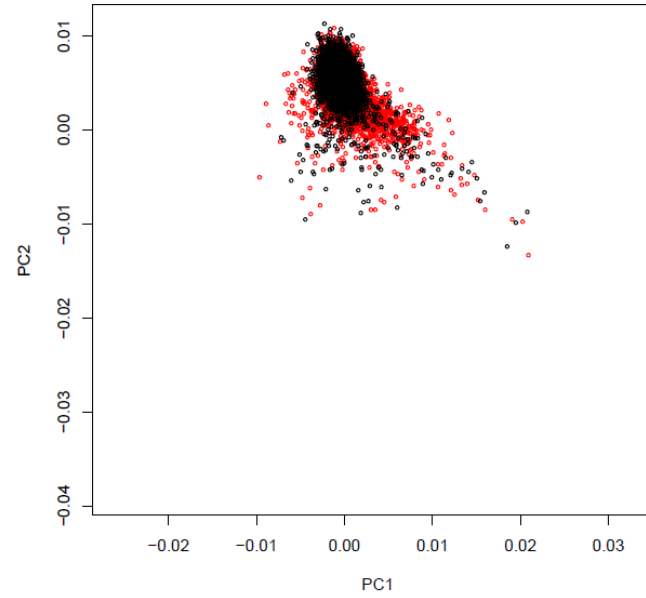

**Figure S2. Mismatch in ancestry between MS cases and controls.** We plot the first two principal components for (a) unmatched data with a severe mismatch (5,429 MS cases and 10,204 controls), (b) stringently matched data using the first 20 PC (4,094 MS cases and 4,094 controls). The controls are depicted in red and cases in black. After PC matching the remaining samples show considerably less population stratification differentiation between cases and controls.

| <i>Term</i>    | Description                                                                          |
|----------------|--------------------------------------------------------------------------------------|
| $\varphi$      | Quantitative liability, the unobserved trait                                         |
| $\beta$        | Effect Size of the SNP                                                               |
| $x$            | Genotype values of candidate SNP, normalized to mean 0 variance 1                    |
| $u$            | Genetic random effect excluding the candidate SNP                                    |
| $e$            | Environmental component                                                              |
| $X$            | Matrix of genotype values of non-candidate SNPs, normalized to mean 0 and variance 1 |
| $\pi$          | Observed binary case control phenotype.                                              |
| $t$            | Threshold corresponding to the disease prevalence                                    |
| $K$            | Prevalence of the disease in the population                                          |
| $P$            | Proportion of cases in the sample                                                    |
| $\hat{\Theta}$ | Genetic Relationship Matrix (GRM) computed from the data                             |
| $\Theta$       | True underlying Genetic Relationship Matrix (GRM)                                    |
| $V$            | Phenotypic covariance matrix                                                         |
| $I$            | Identity matrix                                                                      |
| $h^2$          | Heritability parameter                                                               |

**Table S1: Description of notation used and a brief description of the terms.**

|                  |         |                      |           |
|------------------|---------|----------------------|-----------|
| Computation      | ATT     | MLM                  | LTMLM     |
| GRM and $V^{-1}$ | NA      | $O(MN^2)$            | $O(MN^2)$ |
| PML              | NA      | NA                   | $O(MN^2)$ |
| Assoc. Statistic | $O(MN)$ | $O(MN)$ or $O(MN^2)$ | $O(MN)$   |
| Overall          | $O(MN)$ | $O(MN^2)$            | $O(MN^2)$ |

**Table S2. Computational cost.**  $M$  is the number of SNPs and  $N$  is the number of individuals. We assume that  $M > N > \#MCMC$  iterations. The details of the computational costs of MLM are provided in Table 1 of ref<sup>11</sup>.



|      |      |      |                    |        |                             |                             |                             |                             |                             |                             |
|------|------|------|--------------------|--------|-----------------------------|-----------------------------|-----------------------------|-----------------------------|-----------------------------|-----------------------------|
|      |      | 0.1% | 0.05               | causal | 0.820(0.013)                | 0.811(0.013)                | 0.815(0.013)                | 0.815(0.013)                | 0.801(0.013)                | 0.818(0.013)                |
|      |      |      | 0.001              | causal | 0.727(0.015)                | 0.689(0.015)                | 0.697(0.015)                | 0.697(0.015)                | 0.656(0.016)                | 0.695(0.015)                |
|      |      |      | $1 \times 10^{-6}$ | causal | 0.585(0.016)                | 0.559(0.016)                | 0.551(0.016)                | 0.547(0.016)                | 0.510(0.017)                | 0.559(0.016)                |
|      |      |      | $5 \times 10^{-8}$ | causal | 0.548(0.016)                | 0.511(0.016)                | 0.512(0.016)                | 0.510(0.016)                | 0.475(0.017)                | <b>0.525(0.016)</b>         |
|      |      |      | 0.05               | null   | 0.050(0.001)                | 0.046(0.001)                | 0.050(0.001)                | 0.049(0.001)                | 0.048(0.001)                | 0.050(0.001)                |
|      |      |      | 0.001              | null   | 0.001( $1 \times 10^{-4}$ ) |
|      |      |      | $1 \times 10^{-6}$ | null   | 0(NA)                       | 0(NA)                       | 0(NA)                       | 0(NA)                       | 0(NA)                       | 0(NA)                       |
|      |      |      | $5 \times 10^{-8}$ | null   | 0(NA)                       | 0(NA)                       | 0(NA)                       | 0(NA)                       | 0(NA)                       | 0(NA)                       |
| 5000 | 1000 | 50%  | 0.05               | causal | 0.700(0.016)                | 0.700(0.016)                | 0.642(0.017)                | 0.639(0.017)                | 0.637(0.017)                | 0.636(0.017)                |
|      |      |      | 0.001              | causal | 0.526(0.017)                | 0.529(0.017)                | 0.422(0.017)                | 0.420(0.017)                | 0.424(0.017)                | 0.424(0.017)                |
|      |      |      | $1 \times 10^{-6}$ | causal | 0.337(0.016)                | 0.341(0.016)                | 0.234(0.015)                | 0.231(0.015)                | 0.240(0.015)                | 0.241(0.015)                |
|      |      |      | $5 \times 10^{-8}$ | causal | 0.290(0.015)                | 0.288(0.015)                | 0.19(0.014)                 | 0.185(0.013)                | 0.191(0.014)                | 0.190(0.013)                |
|      |      |      | 0.05               | null   | 0.050( $4 \times 10^{-4}$ ) |
|      |      |      | 0.001              | null   | 0.001( $6 \times 10^{-5}$ ) |
|      |      |      | $1 \times 10^{-6}$ | null   | 0(NA)                       | 0(NA)                       | 0(NA)                       | 0(NA)                       | 0(NA)                       | 0(NA)                       |
|      |      |      | $5 \times 10^{-8}$ | null   | 0(NA)                       | 0(NA)                       | 0(NA)                       | 0(NA)                       | 0(NA)                       | 0(NA)                       |
|      |      | 25%  | 0.05               | causal | 0.727(0.015)                | 0.723(0.015)                | 0.649(0.016)                | 0.649(0.016)                | 0.647(0.016)                | 0.646(0.016)                |
|      |      |      | 0.001              | causal | 0.534(0.017)                | 0.537(0.017)                | 0.446(0.017)                | 0.444(0.017)                | 0.443(0.017)                | 0.445(0.017)                |
|      |      |      | $1 \times 10^{-6}$ | causal | 0.369(0.016)                | 0.376(0.016)                | 0.271(0.015)                | 0.269(0.015)                | 0.270(0.015)                | 0.270(0.015)                |
|      |      |      | $5 \times 10^{-8}$ | causal | 0.324(0.016)                | 0.324(0.016)                | 0.228(0.014)                | 0.227(0.014)                | 0.228(0.014)                | 0.228(0.014)                |
|      |      |      | 0.05               | null   | 0.050( $4 \times 10^{-4}$ ) |
|      |      |      | 0.001              | null   | 0.001( $6 \times 10^{-5}$ ) |
|      |      |      | $1 \times 10^{-6}$ | null   | 0(NA)                       | 0(NA)                       | 0(NA)                       | 0(NA)                       | 0(NA)                       | 0(NA)                       |
|      |      |      | $5 \times 10^{-8}$ | null   | 0(NA)                       | 0(NA)                       | 0(NA)                       | 0(NA)                       | 0(NA)                       | 0(NA)                       |
|      |      | 10%  | 0.05               | causal | 0.741(0.015)                | 0.747(0.015)                | 0.691(0.016)                | 0.690(0.016)                | 0.694(0.016)                | 0.694(0.016)                |
|      |      |      | 0.001              | causal | 0.579(0.016)                | 0.586(0.016)                | 0.518(0.017)                | 0.516(0.017)                | 0.520(0.017)                | 0.516(0.017)                |
|      |      |      | $1 \times 10^{-6}$ | causal | 0.405(0.016)                | 0.403(0.016)                | 0.305(0.016)                | 0.303(0.016)                | 0.305(0.016)                | 0.307(0.016)                |
|      |      |      | $5 \times 10^{-8}$ | causal | 0.349(0.016)                | 0.355(0.016)                | 0.248(0.015)                | 0.245(0.015)                | 0.249(0.015)                | 0.249(0.015)                |
|      |      |      | 0.05               | null   | 0.050( $4 \times 10^{-4}$ ) | 0.050( $4 \times 10^{-4}$ ) | 0.051( $4 \times 10^{-4}$ ) | 0.050( $4 \times 10^{-4}$ ) | 0.050( $4 \times 10^{-4}$ ) | 0.051( $4 \times 10^{-4}$ ) |

|      |      |      |                    |        |                             |                            |                            |                            |                            |                            |
|------|------|------|--------------------|--------|-----------------------------|----------------------------|----------------------------|----------------------------|----------------------------|----------------------------|
|      |      |      | 0.001              | null   | 0.001(6x10 <sup>-5</sup> )  | 0.001(6x10 <sup>-5</sup> ) | 0.001(7x10 <sup>-5</sup> ) | 0.001(6x10 <sup>-5</sup> ) | 0.001(6x10 <sup>-5</sup> ) | 0.001(7x10 <sup>-5</sup> ) |
|      |      |      | 1x10 <sup>-6</sup> | null   | 0(NA)                       | 0(NA)                      | 0(NA)                      | 0(NA)                      | 0(NA)                      | 0(NA)                      |
|      |      |      | 5x10 <sup>-8</sup> | null   | 0(NA)                       | 0(NA)                      | 0(NA)                      | 0(NA)                      | 0(NA)                      | 0(NA)                      |
|      |      | 1%   | 0.05               | causal | 0.827(0.012)                | 0.834(0.012)               | 0.806(0.013)               | 0.806(0.013)               | 0.801(0.013)               | 0.807(0.013)               |
|      |      |      | 0.001              | causal | 0.700(0.015)                | 0.700(0.015)               | 0.668(0.016)               | 0.664(0.016)               | 0.66(0.016)                | 0.663(0.016)               |
|      |      |      | 1x10 <sup>-6</sup> | causal | 0.555(0.016)                | 0.551(0.016)               | 0.499(0.017)               | 0.496(0.017)               | 0.494(0.017)               | 0.503(0.017)               |
|      |      |      | 5x10 <sup>-8</sup> | causal | 0.514(0.016)                | 0.509(0.016)               | 0.443(0.016)               | 0.441(0.016)               | 0.44(0.016)                | 0.446(0.016)               |
|      |      |      | 0.05               | null   | 0.050(4x10 <sup>-4</sup> )  | 0.050(4x10 <sup>-4</sup> ) | 0.050(4x10 <sup>-4</sup> ) | 0.050(4x10 <sup>-4</sup> ) | 0.050(4x10 <sup>-4</sup> ) | 0.050(4x10 <sup>-4</sup> ) |
|      |      |      | 0.001              | null   | 0.001(6x10 <sup>-5</sup> )  | 0.001(6x10 <sup>-5</sup> ) | 0.001(6x10 <sup>-5</sup> ) | 0.001(6x10 <sup>-5</sup> ) | 0.001(6x10 <sup>-5</sup> ) | 0.001(6x10 <sup>-5</sup> ) |
|      |      |      | 1x10 <sup>-6</sup> | null   | 0(NA)                       | 0(NA)                      | 0(NA)                      | 0(NA)                      | 0(NA)                      | 0(NA)                      |
|      |      |      | 5x10 <sup>-8</sup> | null   | 0(NA)                       | 0(NA)                      | 0(NA)                      | 0(NA)                      | 0(NA)                      | 0(NA)                      |
|      |      | 0.1% | 0.05               | causal | 0.845(0.012)                | 0.854(0.012)               | 0.852(0.012)               | 0.852(0.012)               | 0.848(0.012)               | 0.852(0.012)               |
|      |      |      | 0.001              | causal | 0.771(0.014)                | 0.770(0.014)               | 0.775(0.014)               | 0.775(0.014)               | 0.770(0.014)               | 0.770(0.014)               |
|      |      |      | 1x10 <sup>-6</sup> | causal | 0.689(0.015)                | 0.667(0.015)               | 0.657(0.016)               | 0.657(0.016)               | 0.631(0.016)               | <b>0.688(0.015)</b>        |
|      |      |      | 5x10 <sup>-8</sup> | causal | 0.666(0.016)                | 0.654(0.016)               | 0.620(0.016)               | 0.593(0.016)               | 0.555(0.016)               | 0.590(0.016)               |
|      |      |      | 0.05               | null   | 0.049(4x10 <sup>-4</sup> )  | 0.049(4x10 <sup>-4</sup> ) | 0.051(4x10 <sup>-4</sup> ) | 0.051(4x10 <sup>-4</sup> ) | 0.049(4x10 <sup>-4</sup> ) | 0.051(4x10 <sup>-4</sup> ) |
|      |      |      | 0.001              | null   | 0.001(7x10 <sup>-5</sup> )  | 0.001(6x10 <sup>-5</sup> ) | 0.001(6x10 <sup>-5</sup> ) | 0.001(6x10 <sup>-5</sup> ) | 0.001(6x10 <sup>-5</sup> ) | 0.001(6x10 <sup>-5</sup> ) |
|      |      |      | 1x10 <sup>-6</sup> | null   | 0(NA)                       | 0(NA)                      | 0(NA)                      | 0(NA)                      | 0(NA)                      | 0(NA)                      |
|      |      |      | 5x10 <sup>-8</sup> | null   | 0(NA)                       | 0(NA)                      | 0(NA)                      | 0(NA)                      | 0(NA)                      | 0(NA)                      |
| 5000 | 5000 | 50%  | 0.05               | causal | 0.696(0.007)                | 0.703(0.007)               | 0.630(0.007)               | 0.629(0.007)               | 0.633(0.007)               | 0.632(0.007)               |
|      |      |      | 0.001              | causal | 0.519(0.008)                | 0.530(0.008)               | 0.415(0.008)               | 0.415(0.008)               | 0.424(0.008)               | 0.424(0.008)               |
|      |      |      | 1x10 <sup>-6</sup> | causal | 0.332(0.007)                | 0.344(0.007)               | 0.229(0.006)               | 0.229(0.006)               | 0.236(0.007)               | 0.235(0.007)               |
|      |      |      | 5x10 <sup>-8</sup> | causal | 0.285(0.007)                | 0.295(0.007)               | 0.186(0.006)               | 0.184(0.006)               | 0.191(0.006)               | 0.190(0.006)               |
|      |      |      | 0.05               | null   | 0.0491(4x10 <sup>-4</sup> ) | 0.049(4x10 <sup>-4</sup> ) |
|      |      |      | 0.001              | null   | 0.001(6x10 <sup>-5</sup> )  | 0.001(6x10 <sup>-5</sup> ) | 0.001(6x10 <sup>-5</sup> ) | 0.001(6x10 <sup>-5</sup> ) | 0.001(6x10 <sup>-5</sup> ) | 0.001(6x10 <sup>-5</sup> ) |
|      |      |      | 1x10 <sup>-6</sup> | null   | 0(NA)                       | 0(NA)                      | 0(NA)                      | 0(NA)                      | 0(NA)                      | 0(NA)                      |
|      |      |      | 5x10 <sup>-8</sup> | null   | 0(NA)                       | 0(NA)                      | 0(NA)                      | 0(NA)                      | 0(NA)                      | 0(NA)                      |
|      |      | 25%  | 0.05               | causal | 0.694(0.007)                | 0.700(0.007)               | 0.628(0.007)               | 0.628(0.007)               | 0.632(0.007)               | 0.632(0.007)               |
|      |      |      | 0.001              | causal | 0.512(0.008)                | 0.523(0.008)               | 0.427(0.008)               | 0.427(0.008)               | 0.434(0.008)               | 0.434(0.008)               |

|      |                    |        |                              |                                           |                              |                             |                             |                             |
|------|--------------------|--------|------------------------------|-------------------------------------------|------------------------------|-----------------------------|-----------------------------|-----------------------------|
|      | $1 \times 10^{-6}$ | causal | 0.344(0.007)                 | 0.355(0.007)                              | 0.260(0.007)                 | 0.260(0.007)                | 0.265(0.007)                | 0.265(0.007)                |
|      | $5 \times 10^{-8}$ | causal | 0.297(0.007)                 | 0.307(0.007)                              | 0.211(0.006)                 | 0.211(0.006)                | 0.215(0.006)                | 0.215(0.006)                |
|      | 0.05               | null   | 0.050( $4 \times 10^{-4}$ )  | 0.050( $4 \times 10^{-4}$ )               | 0.050( $4 \times 10^{-4}$ )  | 0.050( $4 \times 10^{-4}$ ) | 0.050( $4 \times 10^{-4}$ ) | 0.050( $4 \times 10^{-4}$ ) |
|      | 0.001              | null   | 0.001 ( $7 \times 10^{-5}$ ) | 0.001( $6 \times 10^{-5}$ )               | 0.001 ( $6 \times 10^{-5}$ ) | 0.001( $6 \times 10^{-5}$ ) | 0.001( $6 \times 10^{-5}$ ) | 0.001( $6 \times 10^{-5}$ ) |
|      | $1 \times 10^{-6}$ | null   | 0(NA)                        | 0(NA)                                     | 0(NA)                        | 0(NA)                       | 0(NA)                       | 0(NA)                       |
|      | $5 \times 10^{-8}$ | null   | 0(NA)                        | 0(NA)                                     | 0(NA)                        | 0(NA)                       | 0(NA)                       | 0(NA)                       |
| 10%  | 0.05               | causal | 0.751(0.006)                 | 0.758(0.006)                              | 0.704(0.007)                 | 0.703(0.007)                | 0.706(0.007)                | 0.709(0.007)                |
|      | 0.001              | causal | 0.592(0.007)                 | 0.597(0.007)                              | 0.516(0.008)                 | 0.516(0.008)                | 0.517(0.008)                | 0.520(0.008)                |
|      | $1 \times 10^{-6}$ | causal | 0.428(0.007)                 | 0.434(0.007)                              | 0.335(0.007)                 | 0.334(0.007)                | 0.335(0.007)                | 0.339(0.007)                |
|      | $5 \times 10^{-8}$ | causal | 0.373(0.007)                 | 0.384(0.007)                              | 0.278(0.007)                 | 0.277(0.007)                | 0.280(0.007)                | 0.285(0.007)                |
|      | 0.05               | null   | 0.049( $4 \times 10^{-4}$ )  | 0.049( $4 \times 10^{-4}$ )               | 0.049( $4 \times 10^{-4}$ )  | 0.049( $4 \times 10^{-4}$ ) | 0.049( $4 \times 10^{-4}$ ) | 0.050( $4 \times 10^{-4}$ ) |
|      | 0.001              | null   | 0.001 ( $6 \times 10^{-5}$ ) | 0.001( $6 \times 10^{-5}$ )               | 0.001 ( $6 \times 10^{-5}$ ) | 0.001( $6 \times 10^{-5}$ ) | 0.001( $6 \times 10^{-5}$ ) | 0.001( $6 \times 10^{-5}$ ) |
|      | $1 \times 10^{-6}$ | null   | 0(NA)                        | 0(NA)                                     | 0(NA)                        | 0(NA)                       | 0(NA)                       | 0(NA)                       |
|      | $5 \times 10^{-8}$ | null   | 0(NA)                        | 0(NA)                                     | 0(NA)                        | 0(NA)                       | 0(NA)                       | 0(NA)                       |
| 1%   | 0.05               | causal | 0.805(0.006)                 | 0.803(0.006)                              | 0.775(0.006)                 | 0.775(0.006)                | 0.773(0.006)                | 0.780(0.006)                |
|      | 0.001              | causal | 0.668(0.007)                 | 0.664(0.007)                              | 0.626(0.007)                 | 0.626(0.007)                | 0.618(0.007)                | 0.631(0.007)                |
|      | $1 \times 10^{-6}$ | causal | 0.526(0.007)                 | 0.516(0.007)                              | 0.479(0.007)                 | 0.479(0.007)                | 0.468(0.007)                | 0.485(0.007)                |
|      | $5 \times 10^{-8}$ | causal | 0.482(0.007)                 | 0.469(0.007)                              | 0.429(0.007)                 | 0.428(0.007)                | 0.415(0.007)                | 0.433(0.007)                |
|      | 0.05               | null   | 0.050( $4 \times 10^{-4}$ )  | 0.045( $4 \times 10^{-4}$ )               | 0.050( $4 \times 10^{-4}$ )  | 0.050( $4 \times 10^{-4}$ ) | 0.050( $4 \times 10^{-4}$ ) | 0.050( $4 \times 10^{-4}$ ) |
|      | 0.001              | null   | 0.001( $6 \times 10^{-5}$ )  | 0.001( $5 \times 10^{-5}$ )               | 0.001( $6 \times 10^{-5}$ )  | 0.001( $6 \times 10^{-5}$ ) | 0.001( $6 \times 10^{-5}$ ) | 0.001( $6 \times 10^{-5}$ ) |
|      | $1 \times 10^{-6}$ | null   | 0(NA)                        | 0(NA)                                     | 0(NA)                        | 0(NA)                       | 0(NA)                       | 0(NA)                       |
|      | $5 \times 10^{-8}$ | null   | 0(NA)                        | 0(NA)                                     | 0(NA)                        | 0(NA)                       | 0(NA)                       | 0(NA)                       |
| 0.1% | 0.05               | causal | 0.833(0.005)                 | 0.812(0.006)                              | 0.818(0.006)                 | 0.818(0.006)                | 0.799(0.006)                | 0.821(0.006)                |
|      | 0.001              | causal | 0.726(0.007)                 | 0.697(0.007)                              | 0.702(0.007)                 | 0.702(0.007)                | 0.670(0.007)                | 0.705(0.007)                |
|      | $1 \times 10^{-6}$ | causal | 0.599(0.007)                 | 0.554(0.007)                              | 0.562(0.007)                 | 0.560(0.007)                | 0.516(0.007)                | 0.564(0.007)                |
|      | $5 \times 10^{-8}$ | causal | 0.554(0.007)                 | 0.510(0.007)                              | 0.516(0.007)                 | 0.516(0.007)                | 0.470(0.007)                | 0.519(0.007)                |
|      | 0.05               | null   | 0.050( $4 \times 10^{-4}$ )  | 0.0324( $4 \times 10^{-4}$ )              | 0.050( $4 \times 10^{-4}$ )  | 0.050( $4 \times 10^{-4}$ ) | 0.040( $4 \times 10^{-4}$ ) | 0.050( $4 \times 10^{-4}$ ) |
|      | 0.001              | null   | 0.001 ( $6 \times 10^{-5}$ ) | $3 \times 10^{-4}$ ( $4 \times 10^{-5}$ ) | 0.001( $6 \times 10^{-5}$ )  | 0.001( $6 \times 10^{-5}$ ) | 0.001( $5 \times 10^{-5}$ ) | 0.001( $6 \times 10^{-5}$ ) |



|      |       |     |                    |        |                             |                             |                             |                             |                             |                             |
|------|-------|-----|--------------------|--------|-----------------------------|-----------------------------|-----------------------------|-----------------------------|-----------------------------|-----------------------------|
|      |       |     | $1 \times 10^{-6}$ | null   | 0(NA)                       | 0(NA)                       | 0(NA)                       | 0(NA)                       | 0(NA)                       | 0(NA)                       |
|      |       |     | $5 \times 10^{-8}$ | null   | 0(NA)                       | 0(NA)                       | 0(NA)                       | 0(NA)                       | 0(NA)                       | 0(NA)                       |
| 5000 | 50000 | 50% | 0.05               | causal | 0.702(0.007)                | 0.703(0.007)                | 0.631(0.007)                | 0.631(0.007)                | 0.631(0.007)                | 0.631(0.007)                |
|      |       |     | 0.001              | causal | 0.518(0.008)                | 0.520(0.008)                | 0.418(0.008)                | 0.418(0.008)                | 0.419(0.008)                | 0.420(0.008)                |
|      |       |     | $1 \times 10^{-6}$ | causal | 0.331(0.007)                | 0.333(0.007)                | 0.231(0.006)                | 0.230(0.006)                | 0.232(0.006)                | 0.231(0.006)                |
|      |       |     | $5 \times 10^{-8}$ | causal | 0.278(0.007)                | 0.280(0.007)                | 0.183(0.006)                | 0.182(0.006)                | 0.183(0.006)                | 0.184(0.006)                |
|      |       |     | 0.05               | null   | 0.050( $1 \times 10^{-4}$ ) |
|      |       |     | 0.001              | null   | 0.001( $2 \times 10^{-5}$ ) |
|      |       |     | $1 \times 10^{-6}$ | null   | 0(NA)                       | 0(NA)                       | 0(NA)                       | 0(NA)                       | 0(NA)                       | 0(NA)                       |
|      |       |     | $5 \times 10^{-8}$ | null   | 0(NA)                       | 0(NA)                       | 0(NA)                       | 0(NA)                       | 0(NA)                       | 0(NA)                       |
|      |       | 25% | 0.05               | causal | 0.706(0.007)                | 0.710(0.007)                | 0.652(0.007)                | 0.652(0.007)                | 0.652(0.007)                | 0.652(0.007)                |
|      |       |     | 0.001              | causal | 0.539(0.008)                | 0.540(0.008)                | 0.450(0.008)                | 0.449(0.008)                | 0.450(0.008)                | 0.450(0.008)                |
|      |       |     | $1 \times 10^{-6}$ | causal | 0.362(0.007)                | 0.363(0.007)                | 0.259(0.007)                | 0.259(0.007)                | 0.262(0.007)                | 0.261(0.007)                |
|      |       |     | $5 \times 10^{-8}$ | causal | 0.308(0.007)                | 0.312(0.007)                | 0.207(0.006)                | 0.206(0.006)                | 0.209(0.006)                | 0.209(0.006)                |
|      |       |     | 0.05               | null   | 0.050( $1 \times 10^{-4}$ ) |
|      |       |     | 0.001              | null   | 0.001( $2 \times 10^{-5}$ ) |
|      |       |     | $1 \times 10^{-6}$ | null   | 0(NA)                       | 0(NA)                       | 0(NA)                       | 0(NA)                       | 0(NA)                       | 0(NA)                       |
|      |       |     | $5 \times 10^{-8}$ | null   | 0(NA)                       | 0(NA)                       | 0(NA)                       | 0(NA)                       | 0(NA)                       | 0(NA)                       |
|      |       | 10% | 0.05               | causal | 0.751(0.006)                | 0.755(0.006)                | 0.726(0.007)                | 0.726(0.007)                | 0.725(0.007)                | 0.720(0.007)                |
|      |       |     | 0.001              | causal | 0.629(0.007)                | 0.631(0.007)                | 0.548(0.008)                | 0.545(0.008)                | 0.555(0.007)                | 0.551(0.007)                |
|      |       |     | $1 \times 10^{-6}$ | causal | 0.466(0.007)                | 0.474(0.007)                | 0.355(0.007)                | 0.355(0.007)                | 0.355(0.007)                | 0.355(0.007)                |
|      |       |     | $5 \times 10^{-8}$ | causal | 0.381(0.007)                | 0.385(0.007)                | 0.272(0.007)                | 0.270(0.007)                | 0.274(0.007)                | 0.273(0.007)                |
|      |       |     | 0.05               | null   | 0.050( $1 \times 10^{-4}$ ) |
|      |       |     | 0.001              | null   | 0.001( $2 \times 10^{-5}$ ) |
|      |       |     | $1 \times 10^{-6}$ | null   | 0(NA)                       | 0(NA)                       | 0(NA)                       | 0(NA)                       | 0(NA)                       | 0(NA)                       |
|      |       |     | $5 \times 10^{-8}$ | null   | 0(NA)                       | 0(NA)                       | 0(NA)                       | 0(NA)                       | 0(NA)                       | 0(NA)                       |
|      |       | 1%  | 0.05               | causal | 0.793(0.006)                | 0.795(0.006)                | 0.770(0.006)                | 0.770(0.006)                | 0.769(0.006)                | 0.770(0.006)                |
|      |       |     | 0.001              | causal | 0.671(0.007)                | 0.671(0.007)                | 0.634(0.007)                | 0.634(0.007)                | 0.634(0.007)                | 0.637(0.007)                |
|      |       |     | $1 \times 10^{-6}$ | causal | 0.526(0.007)                | 0.526(0.007)                | 0.477(0.007)                | 0.476(0.007)                | 0.476(0.007)                | 0.480(0.007)                |

|      |                    |        |                             |                             |                             |                             |                             |                             |
|------|--------------------|--------|-----------------------------|-----------------------------|-----------------------------|-----------------------------|-----------------------------|-----------------------------|
|      | $5 \times 10^{-8}$ | causal | 0.484(0.007)                | 0.485(0.007)                | 0.431(0.007)                | 0.431(0.007)                | 0.429(0.007)                | 0.432(0.007)                |
|      | 0.05               | null   | 0.050( $1 \times 10^{-4}$ ) |
|      | 0.001              | null   | 0.001( $2 \times 10^{-5}$ ) |
|      | $1 \times 10^{-6}$ | null   | 0(NA)                       | 0(NA)                       | 0(NA)                       | 0(NA)                       | 0(NA)                       | 0(NA)                       |
|      | $5 \times 10^{-8}$ | null   | 0(NA)                       | 0(NA)                       | 0(NA)                       | 0(NA)                       | 0(NA)                       | 0(NA)                       |
| 0.1% | 0.05               | causal | 0.835(0.005)                | 0.833(0.005)                | 0.821(0.006)                | 0.820(0.006)                | 0.817(0.006)                | 0.821(0.006)                |
|      | 0.001              | causal | 0.719(0.007)                | 0.717(0.007)                | 0.697(0.007)                | 0.697(0.007)                | 0.688(0.007)                | 0.697(0.007)                |
|      | $1 \times 10^{-6}$ | causal | 0.588(0.007)                | 0.587(0.007)                | 0.561(0.007)                | 0.560(0.007)                | 0.557(0.007)                | 0.560(0.007)                |
|      | $5 \times 10^{-8}$ | causal | 0.547(0.007)                | 0.545(0.007)                | 0.517(0.007)                | 0.517(0.007)                | 0.508(0.007)                | 0.518(0.007)                |
|      | 0.05               | null   | 0.050( $1 \times 10^{-4}$ ) |
|      | 0.001              | null   | 0.001( $2 \times 10^{-5}$ ) |
|      | $1 \times 10^{-6}$ | null   | 0(NA)                       | 0(NA)                       | 0(NA)                       | 0(NA)                       | 0(NA)                       | 0(NA)                       |
|      | $5 \times 10^{-8}$ | null   | 0(NA)                       | 0(NA)                       | 0(NA)                       | 0(NA)                       | 0(NA)                       | 0(NA)                       |

**Table S3. Percentage of SNPs achieving alpha levels for simulated genotypes and simulated phenotypes.** We report the true positive and false positives at different  $\alpha$  levels. For completeness, we also report ATT and MLM statistics computed using the underlying liability, where we again observe a loss in power for MLM at lower prevalence. In bold are the settings where LTMLM demonstrates at least a 5% power improvement over MLM.

| N    | M      | Prev           | Set            | Statistic      | ATT<br>Liability | MLM Liability | ATT           | LogR                 | MLM                  | LTMLM         |
|------|--------|----------------|----------------|----------------|------------------|---------------|---------------|----------------------|----------------------|---------------|
| 1000 | 1000   | 50%            | causal         | average        | 25.716(1.091)    | 26.947(1.132) | 16.847(0.715) | 16.367(0.675)        | 17.254(0.735)        | 17.229(0.736) |
|      |        |                | null           | average        | 1.005(0.005)     | 1.003(0.005)  | 1.008(0.005)  | 1.006(0.005)         | 1.008(0.005)         | 1.007(0.005)  |
|      |        |                | all            | average        | 1.252(0.014)     | 1.262(0.015)  | 1.166(0.010)  | 1.160(0.009)         | 1.171(0.010)         | 1.169(0.01)   |
|      |        |                | all            | $\lambda_{GC}$ | 1.034(0.008)     | 1.033(0.008)  | 1.031(0.009)  | 1.031(0.009)         | 1.033(0.008)         | 1.032(0.008)  |
|      | 25%    | causal         | average        | 28.716(1.229)  | 30.022(1.275)    | 19.112(0.824) | 18.475(0.773) | 19.553(0.849)        | 19.571(0.849)        |               |
|      |        | null           | average        | 1.003(0.005)   | 1.004(0.005)     | 1.000(0.004)  | 0.998(0.004)  | 1.002(0.004)         | 1.001(0.004)         |               |
|      |        | all            | average        | 1.280(0.016)   | 1.294(0.016)     | 1.181(0.011)  | 1.173(0.010)  | 1.187(0.011)         | 1.187(0.011)         |               |
|      |        | all            | $\lambda_{GC}$ | 1.019(0.007)   | 1.021(0.007)     | 1.014(0.007)  | 1.013(0.007)  | 1.026(0.007)         | 1.02(0.007)          |               |
|      | 10%    | causal         | average        | 34.541(1.501)  | 35.559(1.539)    | 23.777(1.021) | 22.821(0.943) | 24.084(1.053)        | 24.738(1.098)        |               |
|      |        | null           | average        | 1.001(0.005)   | 1.004(0.005)     | 1.001(0.004)  | 0.999(0.004)  | 1.004(0.004)         | 1.003(0.004)         |               |
|      |        | all            | average        | 1.336(0.019)   | 1.349(0.019)     | 1.229(0.013)  | 1.217(0.012)  | 1.235(0.014)         | 1.241(0.014)         |               |
|      |        | all            | $\lambda_{GC}$ | 1.021(0.008)   | 1.028(0.008)     | 1.025(0.008)  | 1.025(0.008)  | 1.030(0.008)         | 1.029(0.008)         |               |
|      | 1%     | causal         | average        | 55.732(2.12)   | 54.012(2.06)     | 42.316(1.565) | 39.858(1.421) | 40.611(1.539)        | <b>45.336(1.756)</b> |               |
|      |        | null           | average        | 1.002(0.004)   | 0.988(0.004)     | 0.999(0.004)  | 0.997(0.004)  | 0.992(0.004)         | 0.999(0.004)         |               |
|      |        | all            | average        | 1.550(0.028)   | 1.518(0.027)     | 1.412(0.021)  | 1.386(0.019)  | 1.388(0.020)         | 1.443(0.023)         |               |
|      |        | all            | $\lambda_{GC}$ | 1.027(0.008)   | 1.012(0.007)     | 1.02(0.008)   | 1.019(0.008)  | 1.009(0.008)         | 1.018(0.008)         |               |
| 0.1% | causal | average        | 73.159(2.847)  | 63.052(2.549)  | 58.946(2.157)    | 54.625(1.924) | 51.507(2.045) | <b>65.991(2.656)</b> |                      |               |
|      | null   | average        | 0.997(0.004)   | 0.974(0.004)   | 0.996(0.004)     | 0.994(0.004)  | 0.978(0.004)  | 0.996(0.004)         |                      |               |
|      | all    | average        | 1.718(0.037)   | 1.595(0.032)   | 1.575(0.029)     | 1.53(0.026)   | 1.483(0.026)  | 1.646(0.034)         |                      |               |
|      | all    | $\lambda_{GC}$ | 1.035(0.009)   | 1.008(0.007)   | 1.023(0.007)     | 1.023(0.007)  | 1.000(0.007)  | 1.014(0.008)         |                      |               |
| 5000 | 1000   | 50%            | causal         | average        | 25.224(1.076)    | 25.503(1.084) | 16.488(0.703) | 16.029(0.666)        | 16.652(0.713)        | 16.625(0.714) |
|      |        |                | null           | average        | 1.002(0.002)     | 1.002(0.002)  | 1.000(0.002)  | 0.998(0.002)         | 1.000(0.002)         | 0.999(0.002)  |
|      |        |                | all            | average        | 1.050(0.003)     | 1.051(0.003)  | 1.031(0.003)  | 1.028(0.003)         | 1.032(0.003)         | 1.031(0.003)  |
|      |        |                | all            | $\lambda_{GC}$ | 1.006(0.003)     | 1.007(0.003)  | 1.005(0.003)  | 1.005(0.003)         | 1.006(0.003)         | 1.005(0.004)  |
|      | 25%    | causal         | average        | 28.012(1.156)  | 28.279(1.163)    | 18.545(0.767) | 17.985(0.726) | 18.707(0.778)        | 18.757(0.783)        |               |
|      |        | null           | average        | 1.004(0.002)   | 1.004(0.002)     | 1.002(0.002)  | 1.000(0.002)  | 1.002(0.002)         | 1.002(0.002)         |               |

|      |      |      |        |                |               |               |               |               |               |                      |
|------|------|------|--------|----------------|---------------|---------------|---------------|---------------|---------------|----------------------|
|      |      |      | all    | average        | 1.058(0.004)  | 1.059(0.004)  | 1.037(0.003)  | 1.034(0.003)  | 1.038(0.003)  | 1.037(0.003)         |
|      |      |      | all    | $\lambda_{GC}$ | 1.010(0.003)  | 1.011(0.003)  | 1.003(0.003)  | 1.003(0.003)  | 1.004(0.003)  | 1.004(0.003)         |
|      |      | 10%  | causal | average        | 32.953(1.379) | 33.282(1.395) | 22.883(0.948) | 22.028(0.886) | 23.065(0.965) | 23.497(0.996)        |
|      |      |      | null   | average        | 1.005(0.002)  | 1.005(0.002)  | 1.004(0.002)  | 1.002(0.002)  | 1.004(0.002)  | 1.003(0.002)         |
|      |      |      | all    | average        | 1.069(0.004)  | 1.070(0.004)  | 1.047(0.003)  | 1.044(0.003)  | 1.048(0.003)  | 1.048(0.003)         |
|      |      |      | all    | $\lambda_{GC}$ | 1.009(0.003)  | 1.009(0.004)  | 0.999(0.003)  | 0.999(0.003)  | 1.003(0.003)  | 1.001(0.003)         |
|      |      | 1%   | causal | average        | 57.101(2.112) | 56.546(2.100) | 43.459(1.570) | 40.939(1.426) | 43.546(1.611) | <b>46.302(1.760)</b> |
|      |      |      | null   | average        | 1.002(0.002)  | 1.002(0.002)  | 1.001(0.002)  | 0.999(0.002)  | 1.001(0.002)  | 1.001(0.002)         |
|      |      |      | all    | average        | 1.115(0.006)  | 1.113(0.006)  | 1.086(0.005)  | 1.079(0.004)  | 1.086(0.005)  | 1.091(0.005)         |
|      |      |      | all    | $\lambda_{GC}$ | 1.007(0.004)  | 1.009(0.003)  | 1.003(0.003)  | 1.002(0.003)  | 1.005(0.003)  | 1.003(0.004)         |
|      |      | 0.1% | causal | average        | 74.089(2.623) | 68.943(2.51)  | 61.561(2.057) | 57.182(1.828) | 58.752(2.08)  | <b>67.284(2.450)</b> |
|      |      |      | null   | average        | 0.997(0.002)  | 0.993(0.002)  | 0.996(0.002)  | 0.995(0.002)  | 0.991(0.002)  | 0.996(0.002)         |
|      |      |      | all    | average        | 1.143(0.007)  | 1.129(0.007)  | 1.117(0.006)  | 1.107(0.005)  | 1.106(0.006)  | 1.128(0.007)         |
|      |      |      | all    | $\lambda_{GC}$ | 1.004(0.001)  | 0.994(0.002)  | 0.989(0.001)  | 0.988(0.001)  | 1.005(0.002)  | 0.996(0.002)         |
| 5000 | 5000 | 50%  | causal | average        | 25.372(0.496) | 26.69(0.52)   | 16.492(0.325) | 16.399(0.321) | 16.88(0.332)  | 16.867(0.332)        |
|      |      |      | null   | average        | 0.993(0.002)  | 0.994(0.002)  | 0.988(0.002)  | 0.988(0.002)  | 0.99(0.002)   | 0.989(0.002)         |
|      |      |      | all    | average        | 1.237(0.006)  | 1.251(0.007)  | 1.143(0.004)  | 1.142(0.004)  | 1.148(0.004)  | 1.148(0.004)         |
|      |      |      | all    | $\lambda_{GC}$ | 1.010(0.004)  | 1.01(0.003)   | 1.010(0.003)  | 1.010(0.003)  | 1.014(0.003)  | 1.014(0.003)         |
|      |      | 25%  | causal | average        | 28.119(0.588) | 29.56(0.617)  | 18.637(0.388) | 18.509(0.383) | 19.014(0.396) | 19.056(0.398)        |
|      |      |      | null   | average        | 1.001(0.002)  | 1.001(0.002)  | 1.000(0.002)  | 1.000(0.002)  | 1.000(0.002)  | 1.001(0.002)         |
|      |      |      | all    | average        | 1.272(0.007)  | 1.287(0.008)  | 1.177(0.005)  | 1.175(0.005)  | 1.180(0.005)  | 1.181(0.005)         |
|      |      |      | all    | $\lambda_{GC}$ | 1.019(0.004)  | 1.017(0.004)  | 1.012(0.004)  | 1.012(0.004)  | 1.013(0.004)  | 1.013(0.004)         |
|      |      | 10%  | causal | average        | 36.38(0.716)  | 37.626(0.742) | 25.235(0.501) | 25.014(0.492) | 25.386(0.506) | 25.778(0.514)        |
|      |      |      | null   | average        | 0.996(0.002)  | 0.994(0.002)  | 0.993(0.002)  | 0.992(0.002)  | 0.991(0.002)  | 0.992(0.002)         |
|      |      |      | all    | average        | 1.350(0.009)  | 1.361(0.009)  | 1.235(0.006)  | 1.233(0.006)  | 1.235(0.006)  | 1.240(0.007)         |
|      |      |      | all    | $\lambda_{GC}$ | 1.016(0.003)  | 1.017(0.004)  | 1.005(0.003)  | 1.005(0.003)  | 1.007(0.003)  | 1.008(0.003)         |
|      |      | 1%   | causal | average        | 58.172(1.131) | 55.473(1.077) | 45.376(0.878) | 44.682(0.852) | 42.594(0.825) | <b>46.691(0.913)</b> |
|      |      |      | null   | average        | 1.000(0.002)  | 0.954(0.002)  | 1.000(0.002)  | 0.999(0.002)  | 0.990(0.002)  | 1(0.002)             |

|      |       |      |        |                |               |               |               |               |               |                      |
|------|-------|------|--------|----------------|---------------|---------------|---------------|---------------|---------------|----------------------|
|      |       |      | all    | average        | 1.571(0.014)  | 1.499(0.013)  | 1.444(0.011)  | 1.436(0.011)  | 1.406(0.010)  | 1.457(0.011)         |
|      |       |      | all    | $\lambda_{GC}$ | 1.020(0.003)  | 0.970(0.005)  | 1.020(0.003)  | 1.020(0.003)  | 1.011(0.003)  | 1.019(0.003)         |
|      |       | 0.1% | causal | average        | 81.745(1.565) | 66.716(1.29)  | 68.648(1.301) | 67.099(1.248) | 56.303(1.082) | <b>70.81(1.364)</b>  |
|      |       |      | null   | average        | 1.001(0.002)  | 0.840(0.002)  | 1.000(0.002)  | 1.000(0.002)  | 0.918(0.002)  | 1.000 (0.002)        |
|      |       |      | all    | average        | 1.809(0.019)  | 1.499(0.016)  | 1.677(0.016)  | 1.661(0.016)  | 1.472(0.013)  | 1.698(0.017)         |
|      |       |      | all    | $\lambda_{GC}$ | 1.022(0.003)  | 0.861(0.006)  | 1.026(0.003)  | 1.026(0.003)  | 0.942(0.005)  | 1.025(0.003)         |
| 5000 | 50000 | 50%  | causal | average        | 25.501(0.504) | 25.642(0.507) | 16.624(0.331) | 16.529(0.327) | 16.673(0.332) | 16.69(0.333)         |
|      |       |      | null   | average        | 0.999(0.001)  | 0.999(0.001)  | 1.000 (0.001) | 0.999(0.001)  | 1.000 (0.001) | 1.000 (0.001)        |
|      |       |      | all    | average        | 1.023(0.001)  | 1.024(0.001)  | 1.015(0.001)  | 1.015(0.001)  | 1.016(0.001)  | 1.015(0.001)         |
|      |       |      | all    | $\lambda_{GC}$ | 0.999(0.001)  | 1.000 (0.001) | 1.003(0.001)  | 1.002(0.001)  | 0.999(0.001)  | 0.999(0.001)         |
|      |       | 25%  | causal | average        | 28.475(0.555) | 28.638(0.557) | 18.965(0.37)  | 18.843(0.366) | 19.03(0.372)  | 19.04(0.372)         |
|      |       |      | null   | average        | 1.003(0.001)  | 1.003(0.001)  | 1.003(0.001)  | 1.003(0.001)  | 1.003(0.001)  | 1.003(0.001)         |
|      |       |      | all    | average        | 1.030(0.001)  | 1.031(0.001)  | 1.021(0.001)  | 1.020(0.001)  | 1.021(0.001)  | 1.021(0.001)         |
|      |       |      | all    | $\lambda_{GC}$ | 1.004(0.001)  | 1.004(0.001)  | 1.006(0.001)  | 1.006(0.001)  | 1.003(0.001)  | 1.003(0.001)         |
|      |       | 10%  | causal | average        | 34.358(0.639) | 34.704(0.647) | 23.71(0.444)  | 23.528(0.437) | 23.868(0.449) | 23.910(0.450)        |
|      |       |      | null   | average        | 0.999(0.001)  | 1.000 (0.001) | 1.001(0.001)  | 1.000 (0.001) | 1.001(0.001)  | 1.001(0.001)         |
|      |       |      | all    | average        | 1.033(0.001)  | 1.034(0.001)  | 1.023(0.001)  | 1.023(0.001)  | 1.024(0.001)  | 1.024(0.001)         |
|      |       |      | all    | $\lambda_{GC}$ | 1.006(0.001)  | 1.008(0.002)  | 1.007(0.001)  | 1.007(0.001)  | 1.005(0.001)  | 1.004(0.001)         |
|      |       | 1%   | causal | average        | 60.112(1.139) | 59.863(1.135) | 46.683(0.883) | 45.969(0.859) | 46.44(0.881)  | 47.368(0.905)        |
|      |       |      | null   | average        | 1.000 (0.001) | 1.000 (0.001) | 0.999(0.001)  | 0.999(0.001)  | 0.999(0.001)  | 0.999(0.001)         |
|      |       |      | all    | average        | 1.059(0.002)  | 1.058(0.002)  | 1.045(0.001)  | 1.044(0.001)  | 1.045(0.001)  | 1.045(0.001)         |
|      |       |      | all    | $\lambda_{GC}$ | 1.002(0.001)  | 1.002(0.001)  | 1.004(0.001)  | 1.004(0.001)  | 1.001(0.001)  | 1.000 (0.001)        |
|      |       | 0.1% | causal | average        | 79.864(1.54)  | 77.754(1.502) | 67.059(1.278) | 65.561(1.225) | 65.232(1.251) | <b>68.618(1.333)</b> |
|      |       |      | null   | average        | 1.000 (0.001) | 0.999(0.001)  | 0.999(0.001)  | 0.999(0.001)  | 0.999(0.001)  | 0.999(0.001)         |
|      |       |      | all    | average        | 1.078(0.002)  | 1.076(0.002)  | 1.065(0.002)  | 1.063(0.002)  | 1.063(0.002)  | 1.067(0.002)         |
|      |       |      | all    | $\lambda_{GC}$ | 1.002(0.001)  | 1.001(0.001)  | 1.004(0.001)  | 1.004(0.001)  | 1.000(0.001)  | 1.000(0.001)         |

**Table S4. Complete results on simulated genotypes and simulated phenotypes.** Results are analogous to Table 2, but are reported for other values of  $M$  and  $N$  and consist of the same simulations as S3. For completeness, we also report ATT and MLM statistics computed using the underlying liability, where we again

observe a loss in power for MLM at lower prevalence. In bold are the settings where LTMLM demonstrates at least a 5% power improvement over MLM.

| <b>M</b>     | <b>Prev</b> | <b>Set</b>    | <b>Statistic</b> | <b>ATT<br/>Liability</b> | <b>MLM<br/>Liability</b> | <b>ATT</b>    | <b>ATT+PCs</b> | <b>LogR</b>   | <b>LogR +PCs</b> | <b>MLM</b>    | <b>LTMLM</b>  |
|--------------|-------------|---------------|------------------|--------------------------|--------------------------|---------------|----------------|---------------|------------------|---------------|---------------|
| <b>1000</b>  | 10%         | <b>causal</b> | average          | 36.835(1.515)            | 16.352(0.683)            | 24.736(1.002) | 23.406(0.951)  | 23.622(0.93)  | 22.399(0.883)    | 13.222(0.553) | 12.172(0.536) |
|              |             | <b>null</b>   | average          | 2.238(0.032)             | 0.789(0.014)             | 1.814(0.022)  | 1.632(0.020)   | 1.780(0.020)  | 1.601(0.019)     | 0.849(0.012)  | 0.753(0.011)  |
|              |             | <b>all</b>    | average          | 2.584(0.036)             | 0.944(0.016)             | 2.043(0.025)  | 1.849(0.023)   | 1.999(0.023)  | 1.809(0.022)     | 0.973(0.013)  | 0.867(0.013)  |
|              |             | <b>all</b>    | $\lambda_{GC}$   | 1.376(0.042)             | 0.373(0.006)             | 1.240(0.028)  | 1.064(0.010)   | 1.239(0.028)  | 1.062(0.010)     | 0.518(0.007)  | 0.458(0.011)  |
| <b>10000</b> | 10%         | <b>causal</b> | average          | 33.100(1.375)            | 29.318(1.217)            | 22.606(0.943) | 21.99(0.919)   | 21.672(0.876) | 21.104(0.854)    | 20.412(0.867) | 19.817(0.874) |
|              |             | <b>null</b>   | average          | 1.342(0.004)             | 0.965(0.003)             | 1.232(0.003)  | 1.084(0.003)   | 1.226(0.003)  | 1.078(0.002)     | 0.976(0.002)  | 0.948(0.002)  |
|              |             | <b>all</b>    | average          | 1.374(0.004)             | 0.993(0.003)             | 1.253(0.003)  | 1.104(0.003)   | 1.246(0.003)  | 1.098(0.003)     | 0.995(0.003)  | 0.967(0.003)  |
|              |             | <b>all</b>    | $\lambda_{GC}$   | 1.258(0.036)             | 0.882(0.003)             | 1.174(0.025)  | 1.023(0.003)   | 1.174(0.025)  | 1.023(0.003)     | 0.920(0.003)  | 0.893(0.013)  |
| <b>20000</b> | 10%         | <b>causal</b> | average          | 34.93(1.481)             | 32.625(1.39)             | 24.098(1.037) | 23.592(1.014)  | 23.031(0.963) | 22.568(0.943)    | 22.892(1.003) | 22.811(1.006) |
|              |             | <b>null</b>   | average          | 1.281(0.002)             | 0.982(0.002)             | 1.187(0.002)  | 1.042(0.001)   | 1.182(0.002)  | 1.038(0.001)     | 0.986(0.001)  | 0.981(0.001)  |
|              |             | <b>all</b>    | average          | 1.298(0.002)             | 0.998(0.002)             | 1.198(0.002)  | 1.053(0.002)   | 1.193(0.002)  | 1.048(0.001)     | 0.997(0.002)  | 0.992(0.002)  |
|              |             | <b>all</b>    | $\lambda_{GC}$   | 1.247(0.029)             | 0.939(0.002)             | 1.168(0.020)  | 1.013(0.002)   | 1.167(0.020)  | 1.013(0.002)     | 0.958(0.002)  | 0.953(0.006)  |

**Table S5. Results on simulated genotypes and simulated phenotypes with population structure.** We report average  $\chi^2$  statistics for simulations with population structure averaged across 100 simulations for each parameter setting (see main text).

| N    | M     | Prev               | $\alpha$           | set                         | ATT Liability               | MLM Liability               | ATT                         | ATT+PCs                     | LogR                        | LogR +PCs                   | MLM                         | LTMLM                       |
|------|-------|--------------------|--------------------|-----------------------------|-----------------------------|-----------------------------|-----------------------------|-----------------------------|-----------------------------|-----------------------------|-----------------------------|-----------------------------|
| 1000 | 1000  | 10%                | 0.05               | causal                      | 0.758(0.014)                | 0.661(0.016)                | 0.719(0.015)                | 0.715(0.015)                | 0.719(0.015)                | 0.716(0.015)                | 0.611(0.017)                | 0.596(0.017)                |
|      |       |                    | 0.001              | causal                      | 0.623(0.016)                | 0.421(0.017)                | 0.541(0.017)                | 0.535(0.017)                | 0.540(0.017)                | 0.530(0.017)                | 0.36(0.017)                 | 0.334(0.016)                |
|      |       |                    | $1 \times 10^{-6}$ | causal                      | 0.435(0.016)                | 0.220(0.014)                | 0.323(0.016)                | 0.316(0.016)                | 0.315(0.016)                | 0.307(0.016)                | 0.183(0.013)                | 0.153(0.013)                |
|      |       |                    | $5 \times 10^{-8}$ | causal                      | 0.373(0.016)                | 0.176(0.013)                | 0.274(0.015)                | 0.261(0.015)                | 0.265(0.015)                | 0.256(0.015)                | 0.143(0.012)                | 0.116(0.011)                |
|      |       |                    | 0.05               | null                        | 0.097(0.001)                | 0.020(0.001)                | 0.086(0.001)                | 0.069(0.001)                | 0.085(0.001)                | 0.069(0.001)                | 0.022(0.001)                | 0.020(0.001)                |
|      |       |                    | 0.001              | null                        | 0.022(0.001)                | 0.012(0.001)                | 0.018(0.001)                | 0.016(0.001)                | 0.018(0.001)                | 0.016(0.001)                | 0.011(0.001)                | 0.010(0.001)                |
|      |       |                    | $1 \times 10^{-6}$ | null                        | 0.012( $5 \times 10^{-4}$ ) | 0.006( $4 \times 10^{-4}$ ) | 0.010( $4 \times 10^{-4}$ ) | 0.009( $4 \times 10^{-4}$ ) | 0.009( $4 \times 10^{-4}$ ) | 0.009( $4 \times 10^{-4}$ ) | 0.005( $4 \times 10^{-4}$ ) | 0.004( $3 \times 10^{-4}$ ) |
|      |       |                    | $5 \times 10^{-8}$ | null                        | 0.011( $5 \times 10^{-4}$ ) | 0.005( $4 \times 10^{-4}$ ) | 0.008( $4 \times 10^{-4}$ ) | 0.008( $4 \times 10^{-4}$ ) | 0.008( $4 \times 10^{-4}$ ) | 0.007( $4 \times 10^{-4}$ ) | 0.004( $3 \times 10^{-4}$ ) | 0.003( $3 \times 10^{-4}$ ) |
| 1000 | 10000 | 0.05               | causal             | 0.745(0.015)                | 0.729(0.015)                | 0.707(0.015)                | 0.702(0.016)                | 0.707(0.015)                | 0.702(0.016)                | 0.682(0.016)                | 0.674(0.016)                |                             |
|      |       | 0.001              | causal             | 0.587(0.016)                | 0.557(0.017)                | 0.495(0.017)                | 0.492(0.017)                | 0.494(0.017)                | 0.492(0.017)                | 0.475(0.017)                | 0.451(0.017)                |                             |
|      |       | $1 \times 10^{-6}$ | causal             | 0.411(0.016)                | 0.380(0.016)                | 0.322(0.016)                | 0.314(0.016)                | 0.316(0.016)                | 0.311(0.016)                | 0.295(0.016)                | 0.280(0.015)                |                             |
|      |       | $5 \times 10^{-8}$ | causal             | 0.347(0.016)                | 0.315(0.016)                | 0.270(0.015)                | 0.269(0.015)                | 0.266(0.015)                | 0.259(0.015)                | 0.245(0.015)                | 0.225(0.014)                |                             |
|      |       | 0.05               | null               | 0.08( $4 \times 10^{-4}$ )  | 0.038( $3 \times 10^{-4}$ ) | 0.071( $4 \times 10^{-4}$ ) | 0.054( $3 \times 10^{-4}$ ) | 0.071( $4 \times 10^{-4}$ ) | 0.053( $3 \times 10^{-4}$ ) | 0.042( $3 \times 10^{-4}$ ) | 0.04( $3 \times 10^{-4}$ )  |                             |
|      |       | 0.001              | null               | 0.006( $1 \times 10^{-4}$ ) | 0.002( $7 \times 10^{-5}$ ) | 0.004( $9 \times 10^{-5}$ ) | 0.003( $7 \times 10^{-5}$ ) | 0.004( $9 \times 10^{-5}$ ) | 0.003( $7 \times 10^{-5}$ ) | 0.002( $6 \times 10^{-5}$ ) | 0.002( $7 \times 10^{-5}$ ) |                             |
|      |       | $1 \times 10^{-6}$ | null               | 0.001( $5 \times 10^{-5}$ ) | 0.001( $5 \times 10^{-5}$ ) | 0.001( $4 \times 10^{-5}$ ) |                             |
| 1000 | 20000 | 0.05               | causal             | 0.762(0.014)                | 0.753(0.014)                | 0.690(0.016)                | 0.687(0.016)                | 0.690(0.016)                | 0.686(0.016)                | 0.686(0.016)                | 0.682(0.016)                |                             |
|      |       | 0.001              | causal             | 0.588(0.016)                | 0.578(0.017)                | 0.512(0.017)                | 0.506(0.017)                | 0.511(0.017)                | 0.505(0.017)                | 0.490(0.017)                | 0.488(0.017)                |                             |
|      |       | $1 \times 10^{-6}$ | causal             | 0.412(0.016)                | 0.400(0.016)                | 0.315(0.016)                | 0.309(0.016)                | 0.311(0.016)                | 0.306(0.016)                | 0.297(0.015)                | 0.300(0.016)                |                             |
|      |       | $5 \times 10^{-8}$ | causal             | 0.356(0.016)                | 0.340(0.016)                | 0.264(0.015)                | 0.262(0.015)                | 0.260(0.015)                | 0.258(0.015)                | 0.254(0.015)                | 0.254(0.015)                |                             |
|      |       | 0.05               | null               | 0.078( $3 \times 10^{-4}$ ) | 0.043( $2 \times 10^{-4}$ ) | 0.069( $2 \times 10^{-5}$ ) | 0.052( $2 \times 10^{-4}$ ) | 0.068( $2 \times 10^{-4}$ ) | 0.051( $2 \times 10^{-4}$ ) | 0.046( $2 \times 10^{-4}$ ) | 0.045( $2 \times 10^{-4}$ ) |                             |
|      |       | 0.001              | null               | 0.005( $7 \times 10^{-5}$ ) | 0.002( $4 \times 10^{-5}$ ) | 0.003( $6 \times 10^{-5}$ ) | 0.002( $4 \times 10^{-5}$ ) | 0.003( $5 \times 10^{-5}$ ) | 0.002( $4 \times 10^{-5}$ ) | 0.002( $4 \times 10^{-5}$ ) | 0.002( $4 \times 10^{-5}$ ) |                             |
|      |       | $1 \times 10^{-6}$ | null               | 0.001( $3 \times 10^{-5}$ ) | 0.001( $3 \times 10^{-5}$ ) | 0.001( $2 \times 10^{-5}$ ) | 0 (NA)                      |                             |



---

|                    |      |                           |                           |       |       |       |       |       |       |
|--------------------|------|---------------------------|---------------------------|-------|-------|-------|-------|-------|-------|
| $5 \times 10^{-8}$ | null | $0.001(2 \times 10^{-5})$ | $0.001(2 \times 10^{-5})$ | 0(NA) | 0(NA) | 0(NA) | 0(NA) | 0(NA) | 0(NA) |
|--------------------|------|---------------------------|---------------------------|-------|-------|-------|-------|-------|-------|

---

**Table S6. Percentage of SNPs achieving alpha levels for simulated genotypes and simulated phenotypes with population structure.** We report the true positive and false positives at different  $\alpha$  levels for the same simulations as in Table S5 (see main text).

| M     | Prevalence | Liability    |              | Observed     |              |
|-------|------------|--------------|--------------|--------------|--------------|
|       |            | H-E          | REML         | H-E          | REML         |
| 1000  | 50%        | 0.259(0.013) | 0.252(0.01)  | 0.165(0.008) | 0.161(0.006) |
|       | 25%        | 0.241(0.010) | 0.238(0.008) | 0.173(0.007) | 0.171(0.006) |
|       | 10%        | 0.245(0.011) | 0.242(0.007) | 0.233(0.010) | 0.230(0.007) |
| 10000 | 50%        | 0.236(0.014) | 0.245(0.013) | 0.150(0.009) | 0.156(0.008) |
|       | 25%        | 0.250(0.014) | 0.264(0.013) | 0.180(0.010) | 0.190(0.010) |
|       | 10%        | 0.259(0.012) | 0.261(0.009) | 0.246(0.011) | 0.248(0.009) |

**Table S7. Heritability parameter estimates on simulated genotypes and phenotypes.** Results are analogous to Table 3, under different settings of  $M$  and  $N$ .

| M     | Prevalence | Liability    |              | Observed     |              |
|-------|------------|--------------|--------------|--------------|--------------|
|       |            | H-E          | REML         | H-E          | REML         |
| 1000  | 10%        | 0.470(0.013) | 0.415(0.005) | 0.446(0.012) | 0.394(0.005) |
| 10000 | 10%        | 0.407(0.031) | 0.526(0.011) | 0.438(0.044) | 0.500(0.010) |
| 20000 | 10%        | 0.383(0.030) | 0.531(0.013) | 0.408(0.040) | 0.505(0.012) |

**Table S8. Heritability parameter estimates on simulated genotypes and phenotypes with population structure.** These results are from the same simulations used to generate Table S5 and S6. We report results on both liability and observed scales. The true  $h^2$  explained by the SNPs used to build the GRM is 25% on the liability scale for all simulations.

| N    | M     | True Prev | Specified Prev | Set      | Statistic    | ATT Liability | MLM Liability | ATT           | LogR          | MLM           | LTMLM         |               |
|------|-------|-----------|----------------|----------|--------------|---------------|---------------|---------------|---------------|---------------|---------------|---------------|
| 1000 | 1000  | 1%        | 1%             | causal   | average      | 55.732(2.12)  | 54.012(2.06)  | 42.316(1.565) | 39.858(1.421) | 40.611(1.539) | 45.336(1.756) |               |
|      |       |           |                | null     | average      | 1.002(0.004)  | 0.988(0.004)  | 0.999(0.004)  | 0.997(0.004)  | 0.992(0.004)  | 0.999(0.004)  |               |
|      |       |           |                | all      | average      | 1.550(0.028)  | 1.518(0.027)  | 1.412(0.021)  | 1.386(0.019)  | 1.388(0.020)  | 1.443(0.023)  |               |
|      |       |           |                | all      | $\lambda$ GC | 1.027(0.008)  | 1.012(0.007)  | 1.020(0.008)  | 1.019(0.008)  | 1.009(0.008)  | 1.018(0.008)  |               |
|      |       |           | 3.4%           | causal   | average      | As Above      | 44.441(1.805) |
|      |       |           |                | null     | average      | As Above      | 1.009(0.005)  |
|      |       |           |                | all      | average      | As Above      | 1.444(0.023)  |
|      |       |           |                | all      | $\lambda$ GC | As Above      | 1.035(0.008)  |
|      |       |           | 0.2%           | causal   | average      | As Above      | 45.532(1.851) |
|      |       |           |                | null     | average      | As Above      | 1.002(0.004)  |
|      |       |           |                | all      | average      | As Above      | 1.448(0.024)  |
|      |       |           |                | all      | $\lambda$ GC | As Above      | 1.023(0.008)  |
|      |       |           | 0.1%           | causal   | average      | 73.159(2.847) | 63.052(2.549) | 58.946(2.157) | 54.625(1.924) | 51.507(2.045) | 65.991(2.656) |               |
|      |       |           |                | null     | average      | 0.997(0.004)  | 0.974(0.004)  | 0.996(0.004)  | 0.994(0.004)  | 0.978(0.004)  | 0.996(0.004)  |               |
|      |       |           |                | all      | average      | 1.718(0.037)  | 1.595(0.032)  | 1.575(0.029)  | 1.530(0.026)  | 1.483(0.026)  | 1.646(0.034)  |               |
|      |       |           |                | all      | $\lambda$ GC | 1.035(0.009)  | 1.008(0.007)  | 1.023(0.007)  | 1.023(0.007)  | 1.000(0.007)  | 1.014(0.008)  |               |
|      | 0.5%  | causal    | average        | As Above | As Above     | As Above      | As Above      | As Above      | As Above      | 65.281(2.617) |               |               |
|      |       | null      | average        | As Above | As Above     | As Above      | As Above      | As Above      | As Above      | 0.998(0.004)  |               |               |
|      |       | all       | average        | As Above | As Above     | As Above      | As Above      | As Above      | As Above      | 1.641(0.033)  |               |               |
|      |       | all       | $\lambda$ GC   | As Above | As Above     | As Above      | As Above      | As Above      | As Above      | 1.022(0.007)  |               |               |
|      | 0.02% | causal    | average        | As Above | As Above     | As Above      | As Above      | As Above      | As Above      | 68.616(2.729) |               |               |
|      |       | null      | average        | As Above | As Above     | As Above      | As Above      | As Above      | As Above      | 1.003(0.005)  |               |               |
|      |       | all       | average        | As Above | As Above     | As Above      | As Above      | As Above      | As Above      | 1.679(0.035)  |               |               |
|      |       | all       | $\lambda$ GC   | As Above | As Above     | As Above      | As Above      | As Above      | As Above      | 1.022(0.008)  |               |               |

**Table S9. Simulated genotypes and phenotypes with mis-specification of the liability threshold.** LTMLM was run at prevalence of 1% and 0.1% under mis-specification of the threshold,  $t=\text{true} \pm 0.5$ .

| N                  | M    | True Prev          | Specified Prev | $\alpha$           | set          | ATT Liability              | LogR Liability             | ATT                        | LogR                       | MLM                        | LTMLM                      |              |              |
|--------------------|------|--------------------|----------------|--------------------|--------------|----------------------------|----------------------------|----------------------------|----------------------------|----------------------------|----------------------------|--------------|--------------|
| 5000               | 5000 | 1%                 | 1%             | 0.05               | causal       | 0.803(0.013)               | 0.796(0.013)               | 0.767(0.014)               | 0.767(0.014)               | 0.753(0.014)               | 0.769(0.014)               |              |              |
|                    |      |                    |                | 0.001              | causal       | 0.666(0.016)               | 0.665(0.016)               | 0.632(0.016)               | 0.632(0.016)               | 0.619(0.016)               | 0.638(0.016)               |              |              |
|                    |      |                    |                | 1x10 <sup>-6</sup> | causal       | 0.548(0.016)               | 0.543(0.016)               | 0.496(0.017)               | 0.491(0.017)               | 0.477(0.017)               | 0.501(0.017)               |              |              |
|                    |      |                    |                | 5x10 <sup>-8</sup> | causal       | 0.504(0.016)               | 0.500(0.016)               | 0.449(0.016)               | 0.447(0.016)               | 0.433(0.016)               | 0.451(0.016)               |              |              |
|                    |      |                    |                | 0.05               | null         | 0.050(0.001)               | 0.048(0.001)               | 0.050(0.001)               | 0.050(0.001)               | 0.049(0.001)               | 0.050(0.001)               |              |              |
|                    |      |                    |                | 0.001              | null         | 0.001(1x10 <sup>-4</sup> ) |              |              |
|                    |      |                    |                | 1x10 <sup>-6</sup> | null         | 0(NA)                      | 0(NA)                      | 0(NA)                      | 0(NA)                      | 0(NA)                      | 0(NA)                      |              |              |
|                    |      |                    |                | 5x10 <sup>-8</sup> | null         | 0(NA)                      | 0(NA)                      | 0(NA)                      | 0(NA)                      | 0(NA)                      | 0(NA)                      |              |              |
|                    |      |                    |                | 3.4%               | 0.05         | causal                     | As Above                   | As Above     | 0.783(0.014) |
|                    |      |                    |                | 0.001              | causal       | As Above                   | 0.647(0.016) |              |
|                    |      | 1x10 <sup>-6</sup> | causal         | As Above           | As Above     | As Above                   | As Above                   | As Above                   | As Above                   | 0.469(0.017)               |                            |              |              |
|                    |      | 5x10 <sup>-8</sup> | causal         | As Above           | As Above     | As Above                   | As Above                   | As Above                   | As Above                   | 0.428(0.016)               |                            |              |              |
|                    |      | 0.05               | null           | As Above           | As Above     | As Above                   | As Above                   | As Above                   | As Above                   | 0.051(0.001)               |                            |              |              |
|                    |      | 0.001              | null           | As Above           | As Above     | As Above                   | As Above                   | As Above                   | As Above                   | 0.001(1x10 <sup>-4</sup> ) |                            |              |              |
|                    |      | 1x10 <sup>-6</sup> | null           | As Above           | As Above     | As Above                   | As Above                   | As Above                   | As Above                   | 0(NA)                      |                            |              |              |
|                    |      | 5x10 <sup>-8</sup> | null           | As Above           | As Above     | As Above                   | As Above                   | As Above                   | As Above                   | 0(NA)                      |                            |              |              |
|                    |      | 0.2%               | 0.05           | causal             | As Above     | As Above                   | As Above                   | As Above                   | As Above                   | As Above                   | 0.774(0.014)               |              |              |
|                    |      | 0.001              | causal         | As Above           | As Above     | As Above                   | As Above                   | As Above                   | As Above                   | 0.638(0.016)               |                            |              |              |
|                    |      | 1x10 <sup>-6</sup> | causal         | As Above           | As Above     | As Above                   | As Above                   | As Above                   | As Above                   | 0.491(0.017)               |                            |              |              |
|                    |      | 5x10 <sup>-8</sup> | causal         | As Above           | As Above     | As Above                   | As Above                   | As Above                   | As Above                   | 0.439(0.016)               |                            |              |              |
| 0.05               | null | As Above           | As Above       | As Above           | As Above     | As Above                   | As Above                   | 0.050(0.001)               |                            |                            |                            |              |              |
| 0.001              | null | As Above           | As Above       | As Above           | As Above     | As Above                   | As Above                   | 0.001(1x10 <sup>-4</sup> ) |                            |                            |                            |              |              |
| 1x10 <sup>-6</sup> | null | As Above           | As Above       | As Above           | As Above     | As Above                   | As Above                   | 0(NA)                      |                            |                            |                            |              |              |
| 5x10 <sup>-8</sup> | null | As Above           | As Above       | As Above           | As Above     | As Above                   | As Above                   | 0(NA)                      |                            |                            |                            |              |              |
| 0.1%               | 0.1% | 0.05               | causal         | 0.820(0.013)       | 0.811(0.013) | 0.815(0.013)               | 0.815(0.013)               | 0.801(0.013)               | 0.818(0.013)               |                            |                            |              |              |
|                    |      | 0.001              | causal         | 0.727(0.015)       | 0.689(0.015) | 0.697(0.015)               | 0.697(0.015)               | 0.656(0.016)               | 0.695(0.015)               |                            |                            |              |              |
|                    |      | 1x10 <sup>-6</sup> | causal         | 0.585(0.016)       | 0.559(0.016) | 0.551(0.016)               | 0.547(0.016)               | 0.510(0.017)               | 0.559(0.016)               |                            |                            |              |              |

|       |        |        |                            |                            |                            |                            |                            |                            |
|-------|--------|--------|----------------------------|----------------------------|----------------------------|----------------------------|----------------------------|----------------------------|
|       | 5x10-8 | causal | 0.548(0.016)               | 0.511(0.016)               | 0.512(0.016)               | 0.510(0.016)               | 0.475(0.017)               | 0.525(0.016)               |
|       | 0.05   | null   | 0.050(0.001)               | 0.046(0.001)               | 0.050(0.001)               | 0.049(0.001)               | 0.048(0.001)               | 0.050(0.001)               |
|       | 0.001  | null   | 0.001(1x10 <sup>-4</sup> ) |
|       | 1x10-6 | null   | 0(NA)                      | 0(NA)                      | 0(NA)                      | 0(NA)                      | 0(NA)                      | 0(NA)                      |
|       | 5x10-8 | null   | 0(NA)                      | 0(NA)                      | 0(NA)                      | 0(NA)                      | 0(NA)                      | 0(NA)                      |
| 0.5%  | 0.05   | causal | As Above                   | 0.823(0.013)               |
|       | 0.001  | causal | As Above                   | 0.717(0.015)               |
|       | 1x10-6 | causal | As Above                   | 0.569(0.016)               |
|       | 5x10-8 | causal | As Above                   | 0.526(0.016)               |
|       | 0.05   | null   | As Above                   | 0.049(0.001)               |
|       | 0.001  | null   | As Above                   | 0.001(2x10 <sup>-4</sup> ) |
|       | 1x10-6 | null   | As Above                   | 0(NA)                      |
|       | 5x10-8 | null   | As Above                   | 0(NA)                      |
| 0.02% | 0.05   | causal | As Above                   | 0.824(0.012)               |
|       | 0.001  | causal | As Above                   | 0.716(0.015)               |
|       | 1x10-6 | causal | As Above                   | 0.573(0.016)               |
|       | 5x10-8 | causal | As Above                   | 0.523(0.016)               |
|       | 0.05   | null   | As Above                   | 0.050(0.001)               |
|       | 0.001  | null   | As Above                   | 0.001(1x10 <sup>-4</sup> ) |
|       | 1x10-6 | null   | As Above                   | 0(NA)                      |
|       | 5x10-8 | null   | As Above                   | 0(NA)                      |

**Table S10. Percentage of SNPs achieving alpha levels for simulated genotypes and simulated phenotypes with mis-specification of the liability threshold.**  
This corresponds to the same set of simulations as table S9.

| M    | Prevalence |           | Liability    |              | Observed     |              |
|------|------------|-----------|--------------|--------------|--------------|--------------|
|      | True       | Specified | H-E          | REML         | H-E          | REML         |
| 1000 | 1%         | 1%        | 0.246(0.007) | 0.206(0.005) | 0.445(0.013) | 0.373(0.008) |
|      |            | 3.4%      | 0.350(0.012) | 0.290(0.007) | 0.462(0.016) | 0.383(0.010) |
|      |            | 0.2%      | 0.182(0.006) | 0.152(0.004) | 0.445(0.014) | 0.373(0.009) |
|      | 0.1%       | 0.1%      | 0.247(0.008) | 0.175(0.004) | 0.701(0.023) | 0.498(0.011) |
|      |            | 0.5%      | 0.324(0.009) | 0.234(0.004) | 0.689(0.019) | 0.499(0.009) |
|      |            | 0.02%     | 0.184(0.006) | 0.132(0.003) | 0.677(0.022) | 0.486(0.011) |

**Table S11. Heritability parameter estimates on simulated genotypes and phenotypes with misspecification of the liability threshold.** This corresponds to the same set of simulations as Table S9 and S10.

| N    | M    | Prev | Set    | Statistic      | ATT           | LogR          | MLM           | LTMLM         |
|------|------|------|--------|----------------|---------------|---------------|---------------|---------------|
| 1000 | 1000 | 50%  | causal | average        | 18.085(0.248) | 17.859(0.242) | 18.582(0.252) | 18.576(0.254) |
|      |      |      | null   | average        | 0.997(0.004)  | 0.996(0.004)  | 0.998(0.004)  | 0.997(0.004)  |
|      |      |      | all    | average        | 1.168(0.007)  | 1.164(0.007)  | 1.174(0.008)  | 1.173(0.008)  |
|      |      |      | all    | $\lambda_{GC}$ | 1.023(0.007)  | 1.022(0.007)  | 1.026(0.008)  | 1.02(0.007)   |
|      |      | 25%  | causal | average        | 18.531(0.246) | 18.295(0.24)  | 18.987(0.251) | 18.954(0.253) |
|      |      |      | null   | average        | 1.005(0.005)  | 1.003(0.004)  | 1.005(0.005)  | 1.004(0.005)  |
|      |      |      | all    | average        | 1.180(0.008)  | 1.176(0.007)  | 1.185(0.008)  | 1.183(0.008)  |
|      |      |      | all    | $\lambda_{GC}$ | 1.037(0.007)  | 1.036(0.007)  | 1.036(0.007)  | 1.035(0.007)  |
|      |      | 10%  | causal | average        | 20.926(0.268) | 20.628(0.26)  | 21.259(0.272) | 21.347(0.272) |
|      |      |      | null   | average        | 1.005(0.004)  | 1.003(0.004)  | 1.005(0.004)  | 1.004(0.004)  |
|      |      |      | all    | average        | 1.204(0.008)  | 1.200(0.008)  | 1.207(0.008)  | 1.207(0.008)  |
|      |      |      | all    | $\lambda_{GC}$ | 1.031(0.007)  | 1.031(0.007)  | 1.036(0.008)  | 1.037(0.008)  |
|      |      | 1%   | causal | average        | 28.421(0.326) | 27.886(0.314) | 27.697(0.323) | 28.974(0.338) |
|      |      |      | null   | average        | 1.009(0.005)  | 1.007(0.005)  | 1.008(0.005)  | 1.008(0.005)  |
|      |      |      | all    | average        | 1.283(0.010)  | 1.276(0.010)  | 1.275(0.010)  | 1.288(0.010)  |
|      |      |      | all    | $\lambda_{GC}$ | 1.027(0.008)  | 1.027(0.008)  | 1.025(0.008)  | 1.028(0.008)  |
|      |      | 0.1% | causal | average        | 35.927(0.358) | 35.100(0.342) | 33.172(0.347) | 36.654(0.373) |
|      |      |      | null   | average        | 0.999(0.004)  | 0.997(0.004)  | 0.992(0.004)  | 0.998(0.004)  |
|      |      |      | all    | average        | 1.348(0.012)  | 1.338(0.012)  | 1.314(0.012)  | 1.355(0.013)  |
|      |      |      | all    | $\lambda_{GC}$ | 1.031(0.007)  | 1.031(0.007)  | 1.012(0.007)  | 1.022(0.007)  |

**Table S12. Simulated genotypes and phenotypes generated from a logit distribution.** We report average  $\chi^2$  statistics for simulations with phenotypes generated from a logit distribution averaged across 100 simulations for each parameter setting (see main text).

| N                  | M                  | Prev                        | $\alpha$                    | set                         | ATT                         | LogR                        | MLM                         | LTMLM        |
|--------------------|--------------------|-----------------------------|-----------------------------|-----------------------------|-----------------------------|-----------------------------|-----------------------------|--------------|
| 1000               | 1000               | 50%                         | 0.05                        | causal                      | 0.988(0.003)                | 0.988(0.003)                | 0.988(0.003)                | 0.988(0.003) |
|                    |                    |                             | 0.001                       | causal                      | 0.827(0.012)                | 0.821(0.012)                | 0.832(0.012)                | 0.832(0.012) |
|                    |                    |                             | $1 \times 10^{-6}$          | causal                      | 0.210(0.013)                | 0.198(0.013)                | 0.227(0.013)                | 0.230(0.013) |
|                    |                    |                             | $5 \times 10^{-8}$          | causal                      | 0.077(0.008)                | 0.072(0.008)                | 0.089(0.009)                | 0.088(0.009) |
|                    |                    |                             | 0.05                        | null                        | 0.049(0.001)                | 0.049(0.001)                | 0.050(0.001)                | 0.050(0.001) |
|                    |                    | 0.001                       | null                        | 0.001( $1 \times 10^{-4}$ ) |              |
|                    |                    | $1 \times 10^{-6}$          | null                        | 0(NA)                       | 0(NA)                       | 0(NA)                       | 0(NA)                       |              |
|                    |                    | $5 \times 10^{-8}$          | null                        | 0(NA)                       | 0(NA)                       | 0(NA)                       | 0(NA)                       |              |
|                    |                    | 25%                         | 0.05                        | causal                      | 0.997(0.002)                | 0.997(0.002)                | 0.997(0.002)                | 0.995(0.002) |
|                    |                    |                             | 0.001                       | causal                      | 0.832(0.012)                | 0.830(0.012)                | 0.849(0.011)                | 0.844(0.011) |
|                    |                    |                             | $1 \times 10^{-6}$          | causal                      | 0.225(0.013)                | 0.209(0.013)                | 0.243(0.014)                | 0.245(0.014) |
|                    |                    |                             | $5 \times 10^{-8}$          | causal                      | 0.090(0.009)                | 0.081(0.009)                | 0.098(0.009)                | 0.093(0.009) |
|                    |                    |                             | 0.05                        | null                        | 0.050(0.001)                | 0.050(0.001)                | 0.050(0.001)                | 0.050(0.001) |
|                    |                    | 0.001                       | null                        | 0.001( $1 \times 10^{-4}$ ) |              |
|                    |                    | $1 \times 10^{-6}$          | null                        | 0(NA)                       | 0(NA)                       | 0(NA)                       | 0(NA)                       |              |
|                    |                    | $5 \times 10^{-8}$          | null                        | 0(NA)                       | 0(NA)                       | 0(NA)                       | 0(NA)                       |              |
|                    |                    | 10%                         | 0.05                        | causal                      | 0.997(0.002)                | 0.997(0.002)                | 0.998(0.001)                | 0.998(0.001) |
|                    |                    |                             | 0.001                       | causal                      | 0.893(0.010)                | 0.892(0.010)                | 0.894(0.010)                | 0.894(0.010) |
|                    |                    |                             | $1 \times 10^{-6}$          | causal                      | 0.344(0.015)                | 0.334(0.015)                | 0.357(0.015)                | 0.365(0.015) |
|                    |                    |                             | $5 \times 10^{-8}$          | causal                      | 0.140(0.011)                | 0.129(0.011)                | 0.154(0.011)                | 0.160(0.012) |
| 0.05               | null               |                             | 0.051(0.001)                | 0.051(0.001)                | 0.051(0.001)                | 0.050(0.001)                |                             |              |
| 0.001              | null               | 0.001( $1 \times 10^{-4}$ ) |                             |                             |              |
| $1 \times 10^{-6}$ | null               | 0(NA)                       | 0(NA)                       | 0(NA)                       | 0(NA)                       |                             |                             |              |
| $5 \times 10^{-8}$ | null               | 0(NA)                       | 0(NA)                       | 0(NA)                       | 0(NA)                       |                             |                             |              |
| 1%                 | 0.05               | causal                      | 1(NA)                       | 1(NA)                       | 1(NA)                       | 1(NA)                       |                             |              |
|                    | 0.001              | causal                      | 0.978(0.005)                | 0.977(0.005)                | 0.973(0.005)                | 0.980(0.004)                |                             |              |
|                    | $1 \times 10^{-6}$ | causal                      | 0.640(0.015)                | 0.623(0.015)                | 0.613(0.015)                | 0.658(0.015)                |                             |              |
|                    | $5 \times 10^{-8}$ | causal                      | 0.397(0.015)                | 0.378(0.015)                | 0.376(0.015)                | 0.419(0.016)                |                             |              |



|      |                    |        |                            |                            |                            |                            |
|------|--------------------|--------|----------------------------|----------------------------|----------------------------|----------------------------|
|      | 0.05               | null   | 0.051(0.001)               | 0.050(0.001)               | 0.051(0.001)               | 0.051(0.001)               |
|      | 0.001              | null   | 0.001(2x10 <sup>-4</sup> ) | 0.001(2x10 <sup>-4</sup> ) | 0.001(2x10 <sup>-4</sup> ) | 0.001(2x10 <sup>-4</sup> ) |
|      | 1x10 <sup>-6</sup> | null   | 0(NA)                      | 0(NA)                      | 0(NA)                      | 0(NA)                      |
|      | 5x10 <sup>-8</sup> | null   | 0(NA)                      | 0(NA)                      | 0(NA)                      | 0(NA)                      |
| 0.1% | 0.05               | causal | 1(NA)                      | 1(NA)                      | 1(NA)                      | 1(NA)                      |
|      | 0.001              | causal | 0.996(0.002)               | 0.996(0.002)               | 0.995(0.002)               | 0.997(0.002)               |
|      | 1x10 <sup>-6</sup> | causal | 0.868(0.011)               | 0.860(0.011)               | 0.797(0.013)               | 0.880(0.01)                |
|      | 5x10 <sup>-8</sup> | causal | 0.685(0.015)               | 0.664(0.015)               | 0.584(0.016)               | 0.702(0.014)               |
|      | 0.05               | null   | 0.050(0.001)               | 0.050(0.001)               | 0.049(0.001)               | 0.050(0.001)               |
|      | 0.001              | null   | 0.001(1x10 <sup>-4</sup> ) | 0.001(1x10 <sup>-4</sup> ) | 0.001(1x10 <sup>-4</sup> ) | 0.001(1x10 <sup>-4</sup> ) |
|      | 1x10 <sup>-6</sup> | null   | 0(NA)                      | 0(NA)                      | 0(NA)                      | 0(NA)                      |
|      | 5x10 <sup>-8</sup> | null   | 0(NA)                      | 0(NA)                      | 0(NA)                      | 0(NA)                      |

**Table S13. Percentage of SNPs achieving alpha levels for simulated genotypes and phenotypes generated from a logistic distribution.** Results are the same simulations as described in Table S12

| M     | Prev | Set    | Statistic      | ATT Liability | MM Liability  | ATT           | ATT+PCs       | LogR          | LogR+PCs      | MLM           | LTMLM         |
|-------|------|--------|----------------|---------------|---------------|---------------|---------------|---------------|---------------|---------------|---------------|
| 1000  | 50%  | causal | average        | 25.684(1.137) | 29.055(1.26)  | 16.234(0.723) | 15.775(0.705) | 15.566(0.674) | 15.14(0.658)  | 17.480(0.780) | 17.412(0.775) |
|       |      | null   | average        | 1.698(0.015)  | 1.792(0.017)  | 1.444(0.011)  | 1.425(0.010)  | 1.433(0.010)  | 1.415(0.010)  | 1.472(0.011)  | 1.471(0.011)  |
|       |      | all    | average        | 1.938(0.021)  | 2.065(0.023)  | 1.592(0.014)  | 1.569(0.013)  | 1.574(0.013)  | 1.552(0.013)  | 1.632(0.015)  | 1.630(0.015)  |
|       |      | all    | $\lambda_{GC}$ | 1.274(0.018)  | 1.278(0.019)  | 1.214(0.017)  | 1.224(0.017)  | 1.214(0.017)  | 1.223(0.017)  | 1.234(0.017)  | 1.226(0.016)  |
|       | 25%  | causal | average        | 30.169(1.211) | 33.771(1.343) | 19.277(0.771) | 18.581(0.754) | 18.47(0.721)  | 17.822(0.706) | 20.493(0.82)  | 20.642(0.831) |
|       |      | null   | average        | 1.821(0.017)  | 1.917(0.019)  | 1.551(0.012)  | 1.507(0.011)  | 1.538(0.012)  | 1.495(0.011)  | 1.571(0.012)  | 1.577(0.013)  |
|       |      | all    | average        | 2.104(0.023)  | 2.236(0.025)  | 1.728(0.015)  | 1.678(0.014)  | 1.707(0.015)  | 1.658(0.014)  | 1.761(0.016)  | 1.768(0.016)  |
|       |      | all    | $\lambda_{GC}$ | 1.290(0.018)  | 1.288(0.019)  | 1.256(0.016)  | 1.245(0.017)  | 1.255(0.016)  | 1.245(0.017)  | 1.241(0.015)  | 1.243(0.015)  |
|       | 10%  | causal | average        | 34.865(1.45)  | 37.861(1.551) | 22.838(0.961) | 21.406(0.878) | 21.618(0.881) | 20.336(0.808) | 23.865(1.022) | 24.661(1.064) |
|       |      | null   | average        | 1.973(0.020)  | 2.039(0.021)  | 1.664(0.014)  | 1.583(0.012)  | 1.647(0.014)  | 1.568(0.012)  | 1.668(0.014)  | 1.695(0.015)  |
|       |      | all    | average        | 2.302(0.027)  | 2.397(0.028)  | 1.876(0.018)  | 1.781(0.016)  | 1.846(0.017)  | 1.756(0.015)  | 1.890(0.019)  | 1.925(0.019)  |
|       |      | all    | $\lambda_{GC}$ | 1.301(0.017)  | 1.302(0.018)  | 1.271(0.016)  | 1.285(0.015)  | 1.270(0.016)  | 1.284(0.015)  | 1.251(0.017)  | 1.270(0.016)  |
| 10000 | 50%  | causal | average        | 26.781(1.104) | 27.44(1.129)  | 16.898(0.702) | 16.815(0.698) | 16.229(0.659) | 16.156(0.655) | 17.279(0.725) | 17.26(0.725)  |
|       |      | null   | average        | 1.114(0.002)  | 1.114(0.002)  | 1.078(0.002)  | 1.083(0.002)  | 1.074(0.002)  | 1.078(0.002)  | 1.078(0.002)  | 1.076(0.002)  |
|       |      | all    | average        | 1.14(0.003)   | 1.140(0.003)  | 1.094(0.002)  | 1.099(0.002)  | 1.089(0.002)  | 1.094(0.002)  | 1.095(0.002)  | 1.092(0.002)  |
|       |      | all    | $\lambda_{GC}$ | 1.046(0.005)  | 1.042(0.005)  | 1.039(0.005)  | 1.047(0.005)  | 1.039(0.005)  | 1.046(0.005)  | 1.039(0.005)  | 1.035(0.005)  |
|       | 25%  | causal | average        | 27.208(1.154) | 27.938(1.178) | 17.573(0.726) | 17.293(0.696) | 16.856(0.679) | 16.61(0.654)  | 17.976(0.749) | 18.077(0.758) |
|       |      | null   | average        | 1.112(0.002)  | 1.11(0.002)   | 1.076(0.002)  | 1.078(0.002)  | 1.071(0.002)  | 1.073(0.002)  | 1.074(0.002)  | 1.073(0.002)  |
|       |      | all    | average        | 1.138(0.003)  | 1.137(0.003)  | 1.092(0.002)  | 1.094(0.002)  | 1.087(0.002)  | 1.089(0.002)  | 1.091(0.002)  | 1.090(0.002)  |
|       |      | all    | $\lambda_{GC}$ | 1.048(0.005)  | 1.043(0.005)  | 1.040(0.004)  | 1.045(0.004)  | 1.040(0.004)  | 1.044(0.004)  | 1.040(0.004)  | 1.039(0.004)  |
|       | 10%  | causal | average        | 35.911(1.500) | 36.598(1.525) | 24.379(1.026) | 24.116(1.014) | 23.127(0.944) | 22.894(0.934) | 24.987(1.071) | 25.399(1.091) |
|       |      | null   | average        | 1.161(0.003)  | 1.156(0.003)  | 1.112(0.002)  | 1.115(0.002)  | 1.107(0.002)  | 1.110(0.002)  | 1.108(0.002)  | 1.111(0.002)  |
|       |      | all    | average        | 1.196(0.003)  | 1.192(0.003)  | 1.136(0.003)  | 1.138(0.003)  | 1.129(0.002)  | 1.132(0.002)  | 1.131(0.003)  | 1.135(0.003)  |
|       |      | all    | $\lambda_{GC}$ | 1.059(0.005)  | 1.050(0.004)  | 1.051(0.005)  | 1.059(0.004)  | 1.050(0.005)  | 1.058(0.004)  | 1.044(0.004)  | 1.047(0.004)  |

**Table S14. Complete results on real genotypes and simulated phenotypes.** Results include results from Table 4 but we also report ATT and MLM statistics computed using the underlying liability. We report average  $\chi^2$  statistics for simulations with real genotypes and simulated phenotypes averaged across 100 simulations for each parameter setting.

| M                  | Prev                      | $\alpha$                  | ATT Liability             | MLM Liability             | ATT                       | ATT+PCs                   | LogR                      | LogR +PCs                 | MLM                       | LTMLM                     |
|--------------------|---------------------------|---------------------------|---------------------------|---------------------------|---------------------------|---------------------------|---------------------------|---------------------------|---------------------------|---------------------------|
| 1000               | 50%                       | 0.05                      | 0.689(0.016)              | 0.717(0.015)              | 0.614(0.017)              | 0.602(0.017)              | 0.614(0.017)              | 0.603(0.017)              | 0.630(0.017)              | 0.625(0.017)              |
|                    |                           | 0.001                     | 0.504(0.017)              | 0.533(0.017)              | 0.409(0.017)              | 0.408(0.017)              | 0.405(0.017)              | 0.403(0.017)              | 0.415(0.017)              | 0.415(0.017)              |
|                    |                           | $1 \times 10^{-6}$        | 0.320(0.016)              | 0.348(0.016)              | 0.235(0.015)              | 0.227(0.014)              | 0.229(0.014)              | 0.218(0.014)              | 0.256(0.015)              | 0.256(0.015)              |
|                    |                           | $5 \times 10^{-8}$        | 0.289(0.015)              | 0.309(0.016)              | 0.185(0.013)              | 0.178(0.013)              | 0.179(0.013)              | 0.172(0.013)              | 0.205(0.014)              | 0.200(0.014)              |
|                    |                           | 0.05                      | 0.095(0.001)              | 0.099(0.001)              | 0.084(0.001)              | 0.083(0.001)              | 0.084(0.001)              | 0.083(0.001)              | 0.085(0.001)              | 0.085(0.001)              |
|                    | 0.001                     | 0.002(0.001)              | 0.022(0.001)              | 0.014(0.001)              | $0.013(5 \times 10^{-4})$ | 0.013(0.001)              | $0.013(5 \times 10^{-4})$ | 0.014(0.001)              | 0.014(0.001)              |                           |
|                    | $1 \times 10^{-6}$        | $0.007(4 \times 10^{-4})$ | $0.009(4 \times 10^{-4})$ | $0.003(3 \times 10^{-4})$ | $0.003(2 \times 10^{-4})$ | $0.003(3 \times 10^{-4})$ | $0.003(2 \times 10^{-4})$ | $0.004(3 \times 10^{-4})$ | $0.004(3 \times 10^{-4})$ |                           |
|                    | $5 \times 10^{-8}$        | $0.005(3 \times 10^{-4})$ | $0.006(3 \times 10^{-4})$ | $0.002(2 \times 10^{-4})$ | $0.002(2 \times 10^{-4})$ | $0.002(2 \times 10^{-4})$ | $0.002(2 \times 10^{-4})$ | $0.003(2 \times 10^{-4})$ | $0.003(2 \times 10^{-4})$ |                           |
|                    | 25%                       | 0.05                      | 0.737(0.015)              | 0.750(0.014)              | 0.682(0.016)              | 0.671(0.016)              | 0.680(0.016)              | 0.671(0.016)              | 0.689(0.016)              | 0.692(0.016)              |
|                    |                           | 0.001                     | 0.579(0.017)              | 0.603(0.016)              | 0.491(0.017)              | 0.482(0.017)              | 0.486(0.017)              | 0.479(0.017)              | 0.498(0.017)              | 0.496(0.017)              |
| $1 \times 10^{-6}$ |                           | 0.405(0.016)              | 0.437(0.017)              | 0.294(0.016)              | 0.278(0.015)              | 0.281(0.015)              | 0.266(0.015)              | 0.314(0.016)              | 0.311(0.016)              |                           |
| $5 \times 10^{-8}$ |                           | 0.336(0.016)              | 0.387(0.016)              | 0.231(0.014)              | 0.216(0.014)              | 0.218(0.014)              | 0.208(0.014)              | 0.248(0.015)              | 0.251(0.015)              |                           |
| 0.05               |                           | 0.102(0.001)              | 0.104(0.001)              | 0.091(0.001)              | 0.09(0.001)               | 0.091(0.001)              | 0.090(0.001)              | 0.091(0.001)              | 0.092(0.001)              |                           |
| 0.001              | 0.023(0.001)              | 0.026(0.001)              | 0.016(0.001)              | 0.015(0.001)              | 0.016(0.001)              | 0.015(0.001)              | 0.017(0.001)              | 0.018(0.001)              |                           |                           |
| $1 \times 10^{-6}$ | $0.009(4 \times 10^{-4})$ | $0.01(4 \times 10^{-4})$  | $0.005(3 \times 10^{-4})$ | $0.004(3 \times 10^{-4})$ | $0.005(3 \times 10^{-4})$ | $0.004(3 \times 10^{-4})$ | $0.005(3 \times 10^{-4})$ | $0.005(3 \times 10^{-4})$ | $0.005(3 \times 10^{-4})$ |                           |
| $5 \times 10^{-8}$ | $0.006(3 \times 10^{-4})$ | $0.007(4 \times 10^{-4})$ | $0.003(3 \times 10^{-4})$ | $0.003(2 \times 10^{-4})$ | $0.003(2 \times 10^{-4})$ | $0.003(2 \times 10^{-4})$ | $0.004(3 \times 10^{-4})$ | $0.004(3 \times 10^{-4})$ |                           |                           |
| 10%                | 0.05                      | 0.730(0.015)              | 0.740(0.015)              | 0.678(0.016)              | 0.678(0.016)              | 0.678(0.016)              | 0.678(0.016)              | 0.684(0.016)              | 0.694(0.016)              |                           |
|                    | 0.001                     | 0.575(0.017)              | 0.593(0.016)              | 0.498(0.017)              | 0.492(0.017)              | 0.494(0.017)              | 0.490(0.017)              | 0.510(0.017)              | 0.517(0.017)              |                           |
|                    | $1 \times 10^{-6}$        | 0.410(0.016)              | 0.435(0.017)              | 0.332(0.016)              | 0.328(0.016)              | 0.324(0.016)              | 0.316(0.016)              | 0.340(0.016)              | 0.343(0.016)              |                           |
|                    | $5 \times 10^{-8}$        | 0.374(0.016)              | 0.388(0.016)              | 0.271(0.015)              | 0.265(0.015)              | 0.261(0.015)              | 0.251(0.015)              | 0.276(0.015)              | 0.281(0.015)              |                           |
|                    | 0.05                      | 0.106(0.001)              | 0.107(0.001)              | 0.096(0.001)              | 0.095(0.001)              | 0.095(0.001)              | 0.094(0.001)              | 0.095(0.001)              | 0.097(0.001)              |                           |
|                    | 0.001                     | 0.027(0.001)              | 0.028(0.001)              | 0.019(0.001)              | 0.016(0.001)              | 0.019(0.001)              | 0.016(0.001)              | 0.020(0.001)              | 0.020(0.001)              |                           |
|                    | $1 \times 10^{-6}$        | $0.01(4 \times 10^{-4})$  | $0.011(5 \times 10^{-4})$ | $0.007(4 \times 10^{-4})$ | $0.005(3 \times 10^{-4})$ | $0.006(3 \times 10^{-4})$ | $0.005(3 \times 10^{-4})$ | $0.007(4 \times 10^{-4})$ | $0.007(4 \times 10^{-4})$ |                           |
| $5 \times 10^{-8}$ | $0.008(4 \times 10^{-4})$ | $0.008(4 \times 10^{-4})$ | $0.005(3 \times 10^{-4})$ | $0.004(3 \times 10^{-4})$ | $0.005(3 \times 10^{-4})$ | $0.003(3 \times 10^{-4})$ | $0.005(3 \times 10^{-4})$ | $0.005(3 \times 10^{-4})$ |                           |                           |
| 10000              | 50%                       | 0.05                      | 0.713(0.015)              | 0.72(0.015)               | 0.653(0.016)              | 0.652(0.016)              | 0.652(0.016)              | 0.651(0.016)              | 0.656(0.016)              | 0.657(0.016)              |
|                    |                           | 0.001                     | 0.535(0.017)              | 0.551(0.017)              | 0.427(0.017)              | 0.428(0.017)              | 0.422(0.017)              | 0.426(0.017)              | 0.432(0.017)              | 0.433(0.017)              |
|                    |                           | $1 \times 10^{-6}$        | 0.356(0.016)              | 0.365(0.016)              | 0.245(0.015)              | 0.244(0.015)              | 0.238(0.015)              | 0.237(0.015)              | 0.248(0.015)              | 0.245(0.015)              |
|                    |                           | $5 \times 10^{-8}$        | 0.306(0.015)              | 0.311(0.016)              | 0.187(0.013)              | 0.191(0.013)              | 0.181(0.013)              | 0.178(0.013)              | 0.190(0.013)              | 0.189(0.013)              |
|                    |                           | 0.05                      | $0.058(3 \times 10^{-4})$ | $0.058(3 \times 10^{-4})$ | $0.057(3 \times 10^{-4})$ | $0.057(3 \times 10^{-4})$ | $0.056(3 \times 10^{-4})$ | $0.057(3 \times 10^{-4})$ | $0.057(3 \times 10^{-4})$ | $0.056(3 \times 10^{-4})$ |

|     |                    |                            |                            |                            |                            |                            |                            |                            |                            |
|-----|--------------------|----------------------------|----------------------------|----------------------------|----------------------------|----------------------------|----------------------------|----------------------------|----------------------------|
|     | 0.001              | 0.004(9x10 <sup>-5</sup> ) | 0.004(9x10 <sup>-5</sup> ) | 0.003(7x10 <sup>-5</sup> ) | 0.003(7x10 <sup>-5</sup> ) | 0.003(7x10 <sup>-5</sup> ) | 0.003(7x10 <sup>-5</sup> ) | 0.003(8x10 <sup>-5</sup> ) | 0.003(8x10 <sup>-5</sup> ) |
|     | 1x10 <sup>-6</sup> | 0.001(4x10 <sup>-5</sup> ) | 0.001(4x10 <sup>-5</sup> ) | 0.001(3x10 <sup>-5</sup> ) |
|     | 5x10 <sup>-8</sup> | 0.001(4x10 <sup>-5</sup> ) | 0.001(4x10 <sup>-5</sup> ) | 0(NA)                      | 0(NA)                      | 0(NA)                      | 0(NA)                      | 0(NA)                      | 0(NA)                      |
| 25% | 0.05               | 0.725(0.015)               | 0.726(0.015)               | 0.635(0.017)               | 0.633(0.017)               | 0.635(0.017)               | 0.632(0.017)               | 0.635(0.017)               | 0.635(0.017)               |
|     | 0.001              | 0.529(0.017)               | 0.538(0.017)               | 0.440(0.017)               | 0.438(0.017)               | 0.438(0.017)               | 0.437(0.017)               | 0.448(0.017)               | 0.445(0.017)               |
|     | 1x10 <sup>-6</sup> | 0.352(0.016)               | 0.362(0.016)               | 0.266(0.015)               | 0.261(0.015)               | 0.256(0.015)               | 0.254(0.015)               | 0.270(0.015)               | 0.267(0.015)               |
|     | 5x10 <sup>-8</sup> | 0.303(0.015)               | 0.309(0.016)               | 0.209(0.014)               | 0.206(0.014)               | 0.198(0.014)               | 0.197(0.014)               | 0.215(0.014)               | 0.216(0.014)               |
|     | 0.05               | 0.057(3x10 <sup>-4</sup> ) | 0.057(3x10 <sup>-4</sup> ) | 0.056(3x10 <sup>-4</sup> ) | 0.056(3x10 <sup>-4</sup> ) | 0.055(3x10 <sup>-4</sup> ) | 0.056(3x10 <sup>-4</sup> ) | 0.056(3x10 <sup>-4</sup> ) | 0.055(3x10 <sup>-4</sup> ) |
|     | 0.001              | 0.004(9x10 <sup>-5</sup> ) | 0.004(9x10 <sup>-5</sup> ) | 0.003(7x10 <sup>-5</sup> ) |
|     | 1x10 <sup>-6</sup> | 0.001(5x10 <sup>-5</sup> ) | 0.001(5x10 <sup>-5</sup> ) | 0.001(3x10 <sup>-5</sup> ) |
|     | 5x10 <sup>-8</sup> | 0.001(4x10 <sup>-5</sup> ) | 0.001(4x10 <sup>-5</sup> ) | 0(NA)                      | 0(NA)                      | 0(NA)                      | 0(NA)                      | 0(NA)                      | 0(NA)                      |
| 10% | 0.05               | 0.752(0.014)               | 0.756(0.014)               | 0.711(0.015)               | 0.711(0.015)               | 0.709(0.015)               | 0.706(0.015)               | 0.713(0.015)               | 0.715(0.015)               |
|     | 0.001              | 0.597(0.016)               | 0.603(0.016)               | 0.519(0.017)               | 0.528(0.017)               | 0.518(0.017)               | 0.523(0.017)               | 0.520(0.017)               | 0.517(0.017)               |
|     | 1x10 <sup>-6</sup> | 0.437(0.017)               | 0.438(0.017)               | 0.329(0.016)               | 0.330(0.016)               | 0.322(0.016)               | 0.322(0.016)               | 0.328(0.016)               | 0.336(0.016)               |
|     | 5x10 <sup>-8</sup> | 0.380(0.016)               | 0.388(0.016)               | 0.281(0.015)               | 0.275(0.015)               | 0.266(0.015)               | 0.264(0.015)               | 0.283(0.015)               | 0.284(0.015)               |
|     | 0.05               | 0.061(3x10 <sup>-4</sup> ) | 0.06(3x10 <sup>-4</sup> )  | 0.059(3x10 <sup>-4</sup> ) | 0.059(3x10 <sup>-4</sup> ) | 0.058(3x10 <sup>-4</sup> ) | 0.059(3x10 <sup>-4</sup> ) | 0.058(3x10 <sup>-4</sup> ) | 0.058(3x10 <sup>-4</sup> ) |
|     | 0.001              | 0.005(1x10 <sup>-4</sup> ) | 0.005(1x10 <sup>-4</sup> ) | 0.004(8x10 <sup>-5</sup> ) | 0.004(8x10 <sup>-5</sup> ) | 0.003(8x10 <sup>-5</sup> ) | 0.003(8x10 <sup>-5</sup> ) | 0.004(8x10 <sup>-5</sup> ) | 0.004(8x10 <sup>-5</sup> ) |
|     | 1x10 <sup>-6</sup> | 0.001(5x10 <sup>-5</sup> ) | 0.001(5x10 <sup>-5</sup> ) | 0.001(4x10 <sup>-5</sup> ) |
|     | 5x10 <sup>-8</sup> | 0.001(5x10 <sup>-5</sup> ) | 0.001(5x10 <sup>-5</sup> ) | 0.001(4x10 <sup>-5</sup> ) | 0.001(3x10 <sup>-5</sup> ) | 0.001(4x10 <sup>-5</sup> ) | 0.001(3x10 <sup>-5</sup> ) | 0.001(4x10 <sup>-5</sup> ) | 0.001(4x10 <sup>-5</sup> ) |

**Table S15. Percentage of SNPs achieving alpha levels for real genotypes and simulated phenotypes.** Results include results for Table 4, but we also report results for ATT and MLM computed using the underlying liability.

| Category    | Controlling $\lambda_{GC}$ | $\alpha$           | ATT                        | ATT+PCs                    | LogR                       | LogR+PCs                   | MLM                        | LTMLM                      |
|-------------|----------------------------|--------------------|----------------------------|----------------------------|----------------------------|----------------------------|----------------------------|----------------------------|
| Genome Wide | No                         | 0.05               | 0.093(5x10 <sup>-4</sup> ) | 0.068(4x10 <sup>-4</sup> ) | 0.093(5x10 <sup>-4</sup> ) | 0.067(4x10 <sup>-4</sup> ) | 0.067(4x10 <sup>-4</sup> ) | 0.07(4x10 <sup>-4</sup> )  |
| Genome Wide | No                         | 0.001              | 0.006(1x10 <sup>-4</sup> ) | 0.003(9x10 <sup>-5</sup> ) | 0.006(1x10 <sup>-4</sup> ) | 0.003(9x10 <sup>-5</sup> ) | 0.003(9x10 <sup>-5</sup> ) | 0.003(1x10 <sup>-4</sup> ) |
| Genome Wide | No                         | 1x10 <sup>-6</sup> | 0(NA)                      | 0(NA)                      | 0(NA)                      | 0(NA)                      | 0(NA)                      | 0(NA)                      |
| Genome Wide | No                         | 5x10 <sup>-8</sup> | 0(NA)                      | 0(NA)                      | 0(NA)                      | 0(NA)                      | 0(NA)                      | 0(NA)                      |
| Published   | No                         | 0.05               | 0.747(0.050)               | 0.733(0.051)               | 0.747(0.050)               | 0.747(0.050)               | 0.707(0.053)               | 0.747(0.05)                |
| Published   | No                         | 0.001              | 0.427(0.057)               | 0.387(0.056)               | 0.427(0.057)               | 0.387(0.056)               | 0.387(0.056)               | 0.360(0.055)               |
| Published   | No                         | 1x10 <sup>-6</sup> | 0.107(0.036)               | 0.080(0.031)               | 0.107(0.036)               | 0.067(0.029)               | 0.080(0.031)               | 0.093(0.034)               |
| Published   | No                         | 5x10 <sup>-8</sup> | 0.053(0.026)               | 0.040(0.023)               | 0.053(0.026)               | 0.027(0.019)               | 0.027(0.019)               | 0.053(0.026)               |
| Genome Wide | Yes                        | 0.05               | 0.053(4x10 <sup>-4</sup> ) |
| Genome Wide | Yes                        | 0.001              | 0.002(7x10 <sup>-5</sup> ) |
| Genome Wide | Yes                        | 1x10 <sup>-6</sup> | 0(NA)                      | 0(NA)                      | 0(NA)                      | 0(NA)                      | 0(NA)                      | 0(NA)                      |
| Genome Wide | Yes                        | 5x10 <sup>-8</sup> | 0(NA)                      | 0(NA)                      | 0(NA)                      | 0(NA)                      | 0(NA)                      | 0(NA)                      |
| Published   | Yes                        | 0.05               | 0.720(0.052)               | 0.693(0.053)               | 0.720(0.052)               | 0.707(0.053)               | 0.693(0.053)               | 0.733(0.051)               |
| Published   | Yes                        | 0.001              | 0.320(0.054)               | 0.347(0.055)               | 0.320(0.054)               | 0.333(0.054)               | 0.347(0.055)               | 0.347(0.055)               |
| Published   | Yes                        | 1x10 <sup>-6</sup> | 0.040(0.023)               | 0.053(0.026)               | 0.040(0.023)               | 0.067(0.029)               | 0.040(0.023)               | 0.053(0.026)               |
| Published   | Yes                        | 5x10 <sup>-8</sup> | 0.013(0.013)               | 0.013(0.013)               | 0.013(0.013)               | 0.013(0.013)               | 0.013(0.013)               | 0.013(0.013)               |

**Table S16. Proportion of SNPs achieving alpha levels for WTCCC2 MS data set.** The number of known associated SNPs that are significant for LTMLM but not MLM (or vice versa) after controlling for  $\lambda_{GC}$  are 3(0) at  $\alpha = 0.05$ , 1(1) at  $\alpha = 0.001$ , 1(0) at  $\alpha = 1x10^{-6}$ , 0(0) at  $\alpha = 5x10^{-8}$ .

| SNP Set                            | ATT   | PCA  | MLM  | LTMLM |
|------------------------------------|-------|------|------|-------|
| Genome Wide AVERAGE                | 1.38  | 1.16 | 1.14 | 1.17  |
| Genome Wide LD Score INTERCEPT     | 1.29  | 1.09 | 1.08 | 1.10  |
| Published SNPs AVERAGE             | 11.64 | 9.97 | 9.92 | 10.59 |
| Published SNPs/Genome Wide Average | 8.44  | 8.61 | 8.67 | 9.03  |
| Published SNPs/LD score INTERCEPT  | 9.06  | 9.17 | 9.20 | 9.66  |

**Table S17: Results on WTCCC2 MS data set with calibration via LD Score regression.** We report the genome wide  $\chi^2$  averages using 10,034 individuals over 360,557 SNPs and the average across 75 published SNPs standardized by the genome wide average and LD Score regression intercept.

| SNP Set                            | N     | ATT   | MLM   | LTMLM | LTMLM REML |
|------------------------------------|-------|-------|-------|-------|------------|
| Genome Wide AVERAGE                | 8188  | 1.16  | 1.11  | 1.14  | 1.14       |
| Published SNPs AVERAGE             |       | 8.94  | 8.26  | 8.76  | 8.82       |
| Published SNPs/Genome Wide Average |       | 7.73  | 7.45  | 7.71  | 7.73       |
| Genome Wide AVERAGE                | 10034 | 1.38  | 1.14  | 1.17  | 1.24       |
| Published SNPs AVERAGE             |       | 11.64 | 9.92  | 10.59 | 11.04      |
| Published SNPs/Genome Wide Average |       | 8.44  | 8.67  | 9.03  | 8.92       |
| Genome Wide AVERAGE                | 15633 | 3.95  | 1.23  | 1.08  | 1.50       |
| Published SNPs AVERAGE             |       | 18.54 | 11.30 | 5.76  | 13.76      |
| Published SNPs/Genome Wide Average |       | 4.69  | 9.20  | 5.32  | 9.15       |

**Table S18: Results on WTCCC2 MS data set at different levels of QC.** We report results for stringently matched ( $N = 8,188$ ), partially matched ( $N = 10,034$ ) and unmatched ( $N = 15,633$ ) data sets (see main text). The additional column is for the LTMLM REML statistic calculated using the REML estimate of  $h^2$ . LTMLM using the REML estimate for  $h^2$  produces inflated test statistics and it is not recommended.

| N     | Liability      |               | Observed       |               |
|-------|----------------|---------------|----------------|---------------|
|       | HE             | REML          | HE             | REML          |
| 8188  | 0.363 (0.0017) | 0.260 (0.001) | 0.979 (0.005)  | 0.702 (0.003) |
| 10034 | 0.704 (0.009)  | 0.279 (0.001) | 1.901 (0.025)  | 0.753 (0.002) |
| 15633 | 2.792 (0.010)  | 0.293 (0.001) | 7.543 (0.0266) | 0.792 (0.002) |

**Table S19: Heritability parameter estimates on WTCCC2 MS data set at different levels of QC.** We report results for stringently matched ( $N = 8,188$ ), partially matched ( $N = 10,034$ ) and unmatched ( $N = 15,633$ ) data sets (see main text).
